# Supplementary material for: A platform for efficiently producing aliphatic, aromatic, and heterocyclic primary diamines from alcohols
Source: Royal Society of Chemistry journal article supplement (doi:10.1039/d5gc01143d), 2025-01-01
Supplement: d5gc01143d1.pdf [file d5gc01143d1.pdf]

## Supporting Information

### **A platform efficiently produces aliphatic, aromatic, and heterocyclic primary diamines from alcohols**

Zhizhen He<sup>a</sup>, Yeting Han<sup>a</sup>, Wei Song<sup>a,b</sup>, Cong Gao<sup>b</sup>, Xinmiao Liu<sup>a</sup>, Wanqing Wei<sup>\*b</sup> and Jing Wu<sup>\*a,b</sup>

<sup>a</sup> School of Life Sciences and Health Engineering, Jiangnan University, Wuxi 214122, China;

<sup>b</sup> School of Biotechnology and Key Laboratory of Industrial Biotechnology of Ministry of Education, Jiangnan University, Wuxi 214122, China.

\* Corresponding author: Jing Wu; Wanqing Wei

E-mail: wujing@jiangnan.edu.cn;

[wanqwei@163.com](mailto:wanqwei@163.com).

# 1 Content

|    |                                                                                   |    |
|----|-----------------------------------------------------------------------------------|----|
| 2  | Materials and Methods .....                                                       | 1  |
| 3  | General.....                                                                      | 1  |
| 4  | Strains and plasmids .....                                                        | 1  |
| 5  | Construction of recombinant <i>E. coli</i> cells .....                            | 1  |
| 6  | Enzyme expression and preparation of whole-cell catalysts.....                    | 2  |
| 7  | Enzyme purification and kinetic assay .....                                       | 3  |
| 8  | <i>In vitro</i> reaction .....                                                    | 3  |
| 9  | Converting 1a by whole-cell catalysts .....                                       | 4  |
| 10 | Converting a~p by whole-cell catalysts. ....                                      | 4  |
| 11 | Mutagenesis experiments .....                                                     | 5  |
| 12 | HPLC analysis .....                                                               | 6  |
| 13 | MS analysis .....                                                                 | 6  |
| 14 | Initial structure preparation.....                                                | 7  |
| 15 | Molecular docking .....                                                           | 8  |
| 16 | Molecular dynamic simulations. ....                                               | 8  |
| 17 | Supplementary Tables.....                                                         | 10 |
| 18 | Table S1. Comparison of the production performance of primary diamines by this    |    |
| 19 | study with those in relevant literatures. ....                                    | 10 |
| 20 | Table S2. Substrate and product pricesa .....                                     | 12 |
| 21 | Table S3. Comparison of cost-effectiveness of our method with reported processes. |    |
| 22 | .....                                                                             | 13 |
| 23 | Table S4. Candidate ADHs. ....                                                    | 14 |
| 24 | Table S5. Plasmids and strains.....                                               | 15 |
| 25 | Table S6. Primer sequences. ....                                                  | 17 |
| 26 | Table S7. Mutant library of <i>EcADH</i> M1 variants.....                         | 18 |
| 27 | Table S8. Mutant library of <i>EcADH</i> M6 variants.....                         | 19 |
| 28 | Table S9. Mutant library of <i>EcADH</i> M7 variants.....                         | 20 |
| 29 | Table S10. Mutant library of <i>EcPaTA</i> variants. ....                         | 21 |
| 30 | Supplementary Figures .....                                                       | 22 |
| 31 | Figure S1. SDS-PAGE of eight candidate ADHs. ....                                 | 22 |
| 32 | Figure S2. SDS-PAGE of <i>E. coli</i> A01 and <i>E. coli</i> B01.....             | 23 |
| 33 | Figure S3. The single mutants of <i>EcADH</i> .....                               | 24 |
| 34 | Figure S4. Mutants of <i>EcADH</i> (M1-M5).....                                   | 25 |

|    |                                                                                                        |    |
|----|--------------------------------------------------------------------------------------------------------|----|
| 35 | Figure S5. Mutants of <i>EcADH</i> (M1-M7).....                                                        | 26 |
| 36 | Figure S6. Kinetic parameters of <i>EcADH</i> wild-type (WT) and its mutant M7. ....                   | 27 |
| 37 | Figure S7. Sequence alignment of transaminases. <sup>21</sup> .....                                    | 28 |
| 38 | Figure S8. Mutants of <i>EcPaTA</i> <sup>F91Y</sup> . ....                                             | 29 |
| 39 | Figure S9. SDS-PAGE of the recombinant strain <i>E. coli</i> C01-C07. ....                             | 30 |
| 40 | Figure S10. LC-MS spectra of OPA-3a to OPA-3g. ....                                                    | 31 |
| 41 | Figure S11. LC-MS spectra of 3h. ....                                                                  | 32 |
| 42 | Figure S12. LC-MS spectra of 3i. ....                                                                  | 33 |
| 43 | Figure S13. LC-MS spectra of 3j. ....                                                                  | 34 |
| 44 | Figure S14. LC-MS spectra of 3k. ....                                                                  | 35 |
| 45 | Figure S15. LC-MS spectra of 3l. ....                                                                  | 36 |
| 46 | Figure S16. LC-MS spectra of 3m. ....                                                                  | 37 |
| 47 | Figure S17. LC-MS spectra of 3n. ....                                                                  | 38 |
| 48 | Figure S18. LC-MS spectra of 3o. ....                                                                  | 39 |
| 49 | Figure S19. LC-MS spectra of 3p. ....                                                                  | 40 |
| 50 | Figure S20. Root-mean-square deviation (RMSD) of backbone heavy atoms relative                         |    |
| 51 | to the first snapshot during 100 ns MD simulation of <i>EcADH</i> and <i>EcADH</i> <sup>M7</sup> ..... | 41 |
| 52 |                                                                                                        |    |
| 53 |                                                                                                        |    |

## 54 **Materials and Methods**

### 55 **General**

56 Commercial reagents, standards, and solvents were purchased from  
57 Sigma-Aldrich (Shanghai, China), Meryer Chemicals (Shanghai, China),  
58 Aladdin Reagents (Shanghai, China), Macklin Reagent (Shanghai, China), and  
59 Bide Chemicals (Shanghai, China) used without further purification.

### 60 **Strains and plasmids**

61 *E. coli* DH5 $\alpha$  and *E. coli* BL21 (DE3) were used as hosts for gene cloning  
62 and protein expression, respectively. The genes encoding the candidate  
63 alcohol dehydrogenases (ADHs) were chemically synthesized and ligated to  
64 plasmid pET-28a(+) by Talen-bio (Shanghai, China). The genes encoding  
65 glutamate dehydrogenase from *Saccharomyces cerevisiae* (ScGluDH, UniProt  
66 ID: P07262) and single mutant (F91Y) of transaminase from *Escherichia coli*  
67 (*EcPaTA*<sup>F91Y</sup>, UniProt ID: P42588) were reserved by our Lab. Details of strains  
68 and plasmids used in this study were summarized in [Table S5](#).

### 69 **Construction of recombinant *E. coli* cells**

70 DNA fragments of enzyme genes and the linear plasmid backbone were  
71 amplified by PCR using primers with 15 to 20 bp homologous arms that enabled  
72 the subsequent recombination. Full length of enzyme genes was assembled  
73 via overlap PCR and cloned into linear vector in the presence of 5  $\times$  CE II Buffer  
74 and Exnase II (Vazyme Biotech Co., Ltd., Nanjing, China) to generate 15 bp or

75 20 bp sticky ends to promote recombination efficiency. Reaction mixtures were  
76 10  $\mu$ L containing linear vector, enzyme genes, 5  $\times$  CE II Buffer and Exnase II,  
77 incubated in 37  $^{\circ}$ C for 30 min, followed by addition of 100  $\mu$ L competent cells  
78 (*E. coli* DH5 $\alpha$ ) for transformation and plating on LB agar containing appropriate  
79 antibiotics. Resulting transformants were picked and DNA sequenced for  
80 confirmation. Plasmids containing targeted enzyme genes were transformed  
81 into *E. coli* BL21 cells for protein expression and whole-cell biocatalyst  
82 preparation. The detailed information of the strain and plasmids, primers and  
83 synthetic gene sequences were listed in [Tables S5-S6](#).

#### 84 **Enzyme expression and preparation of whole-cell catalysts**

85 Constructed *E. coli* cells were inoculated into 5 mL LB medium containing  
86 appropriate antibiotics (50  $\mu$ g mL $^{-1}$  kanamycin, 100  $\mu$ g mL $^{-1}$  ampicillin, 33  $\mu$ g  
87 mL $^{-1}$  chloramphenicol, 50  $\mu$ g mL $^{-1}$  streptomycin), and cultured at 37  $^{\circ}$ C, 220  
88 rpm for 8 h. Precultures (3 mL) were transferred into 150 mL TB medium with  
89 appropriate antibiotics in 500 mL shaking flasks and cultured at 37  $^{\circ}$ C, 220 rpm  
90 for 2~3 h until the OD $_{600}$  reached 0.8~1.0, then IPTG was added to give a final  
91 concentration of 0.4 mM. The temperature was shifted to 25  $^{\circ}$ C for 14h for  
92 protein expression (*EcADH* protein, the induction temperature was 16  $^{\circ}$ C for  
93 18h). The cells were harvested by centrifugation at 8000  $\times$  g, 4  $^{\circ}$ C for 10 min,  
94 washed with 50 mM 4-(2-Hydroxyethyl) piperazine-1-ethanesulfonic acid buffer  
95 (HEPES, pH 8.0), then Centrifuge at 8000  $\times$  g for 10 minutes at 4  $^{\circ}$ C.  
96 Subsequently, collect the sedimented cells, which will either be used to obtain

97 purified enzymes or act as whole-cell biocatalysts in the following reactions.

## 98 **Enzyme purification and kinetic assay**

99 The cells were lysed using a high-pressure homogenizer. The resulting  
100 crude lysate was centrifuged at  $10,000 \times g$  at  $4\text{ }^{\circ}\text{C}$  for 30 min. The supernatant  
101 was collected, and the protein containing the His-tag was captured using a Ni-  
102 NTA Superflow resin for 30 min and then released using an elution buffer (20  
103 mM Tris-HCl at pH 8.0, 0.3 M NaCl, and 0.5 M imidazole). Protein concentration  
104 was determined using a bicinchoninic acid protein assay kit (Solarbio, China),  
105 and purity was determined using sodium dodecyl-sulfate polyacrylamide gel  
106 electrophoresis.

107 The kinetic parameters of ADHs were monitored by following UV  
108 absorption at a wavelength of 340 nm using a microplate reader (Synergy HT,  
109 BioTek, VT, USA). The assay mixture, which contained 1~200 mM **1a** or **2a**,  
110 0.1 mM  $\text{Zn}^{2+}$ , and 2 mM  $\text{NADP}^{+}$  in 50 mM HEPES buffer (pH 9.0), was  
111 incubated at  $40\text{ }^{\circ}\text{C}$  for 20 min. Then, 2  $\mu\text{M}$  ADHs were added, and the change  
112 in the absorbance at 340 nm was immediately recorded. The concentrations of  
113 NADPH were quantified by continuously recording the changing of the  
114 absorbance at 340 nm ( $\epsilon = 6.22\text{ mM}^{-1}\text{ cm}^{-1}$ ). One unit of enzyme activity is the  
115 amount of enzyme required to convert 1  $\mu\text{M}$  of  $\text{NADP}^{+}$  into NADPH in 1 min.

## 116 ***In vitro* reaction**

117 Mixture preparation: purified *Ec*ADH, *Sc*GluDH, and *Ec*PaTA<sup>F91Y</sup> enzymes

118 were mixed at equimolar concentrations (20  $\mu$ M) and incubated with 5 g/L of  
119 substrate **1a**, 20 mM L-Glu, 50 mM HEPES, 100 mM ammonium formate, 0.5  
120 mM PLP, 1 mM NADP<sup>+</sup>, and 0.5 mM Zn<sup>2+</sup> at pH 9.0. A 5 mL reaction mixture  
121 was placed in a 20 mL brown, light-protected vial. The vial was shaken at 220  
122 rpm and incubated at 37 °C for 6 h. After completion, 1 mL of the reaction  
123 solution was transferred to a 2 mL Eppendorf tube. The reaction was terminated  
124 by heating the sample in boiling water for 10 min, then centrifuged at 12,000  $\times$   
125 g for 10 min, and the supernatant was collected for HPLC analysis. All  
126 experiments were performed in triplicate.

#### 127 **Converting **1a** by whole-cell catalysts**

128 Mixture preparation: constructed *E. coli* cells expressing enzymes of  
129 *EcADH* (wild type or mutant), *ScGluDH* and *EcPaTA*<sup>F91Y</sup> (wild type or mutant)  
130 were reacted with 10~30 g/L **1a**, 20 mM L-Glu, 100 mM HEPES, 200~500 mM  
131 ammonium formate, 0.5 mM PLP, 2 mM NADP<sup>+</sup>, and 0.5 mM Co<sup>2+</sup> at pH 9.0,  
132 final cell density was 12 g CDW/L. A 5 mL reaction mixture was placed in a 20  
133 mL light-protected vial. The vial was shaken at 220 rpm and incubated at 40 °C  
134 for 24 h. Then, samples were prepared for HPLC analysis to determine the titers  
135 of **2a** and **2c**. All experiments were performed in triplicate.

#### 136 **Converting **a~p** by whole-cell catalysts.**

137 Mixture preparation: *E. coli* C03 expressing enzymes of *EcADH*<sup>M7</sup>,  
138 *ScGluDH* and *EcPaTA*<sup>W4</sup> was reacted with 50 mM **a~p**, 20 mM L-Glu, 100 mM

139 HEPES, 200 mM ammonium formate, 0.5 mM PLP, 1 mM NADP<sup>+</sup>, and 0.5 mM  
140 Co<sup>2+</sup> at pH 9.0, final cell density was 12 g CDW/L. A 5 mL reaction mixture was  
141 placed in a 20 mL light-protected vial. The vial was shaken at 220 rpm and  
142 incubated at 40 °C for 24 h. Then, samples were prepared for HPLC analysis  
143 to determine the titers of **3a~3p**. All experiments were performed in triplicate.

#### 144 **Mutagenesis experiments**

145 The experiments about protein engineering were performed using the  
146 whole-plasmid PCR with KOD-Plus-Neo. The whole plasmid PCR system (50  
147 µL) was composed of KOD DNA polymerase (1 µL), 10 × KOD PCR Buffer (5  
148 µL), 2 mM dNTP mix (5 µL), 25 mM MgSO<sub>4</sub> (3 µL), template (50–200 ng),  
149 corresponding primers (10 µM with 1 µL), and sterilized water. The PCR  
150 product was digested with the DpnI quick-cutting enzyme at 37 °C for 30–45  
151 min. The PCR products were transformed into *E. coli* BL21 (DE3) cells for the  
152 following screening or DNA sequencing (GENEWIZ, China). The mutant  
153 libraries of *EcADH* were shown in [Tables S5-S7](#). Mutant library of *EcPaTA* was  
154 shown in [Table S8](#). The screening of mutants was carried out through whole-  
155 cell transformation experiments with **1a** as the substrate. The titer of **2c** was  
156 detected by HPLC to determine the mutants. The relative activity of a mutant  
157 was calculated as the titer of **2c** of the mutant divided by the titer of **2c** of the  
158 template strain.



## 159 **HPLC analysis**

160 The samples were filtered through a 0.22 µm organic membrane, and then  
161 the titer of product amines were determined via HPLC using a Dionex UltiMate  
162 3000 VWD detector (Thermo Fischer Scientific, Germany), an Agilent Zorbax  
163 SB-Aq column (4.6 × 150 mm; Agilent Technologies, USA), and an UV detector  
164 (Thermo Fischer Scientific, Germany) under the following conditions: detection  
165 wavelength: 264 nm, automatic precolumn derivatization with o-phthalaldehyde  
166 (OPA), sample injection volume of 8 µL, sample mixed with 4 µL of OPA, a flow  
167 rate of 1 mL/min, and phase A consisted of a 10 mM K<sub>2</sub>HPO<sub>4</sub> buffer, with the  
168 pH adjusted to 7.3 using formic acid. Mobile phase B consisting of phase A,  
169 methanol, and acetonitrile at 1:3:5 (v/v/v). The ratios between the phase A and  
170 phase B are 0 min (60:40), 2 min (45:55), 15 min (10:90), 19 min (10:90), 22  
171 min (60:40) and 25 min (60:40). The statistical analysis software is Chromeleon  
172 7.2, and the graphing software is OriginPro 2022.

## 173 **MS analysis**

174 Amines were determined by MS. The analytical conditions of MS were as  
175 follows: ionic mode is ESI<sup>+</sup>, capillary voltage: 3.5 kV, cone voltage: 30 V, source  
176 block temperature: 100 °C, desolvation temperature: 400 °C, desolvation gas  
177 flow: 700 lit/h, cone gas flow: 50 lit/h, collision energy: 6/20 V, mass range: 20–  
178 1000 m/z, detector voltage: 1800 V. We used WATERS MALDI SYNAPT Q-  
179 TOF MS to complete the detection. The statistical analysis and graphing  
180 software are MassLynx V4.1.

## 181 Initial structure preparation

182 The *Ec*ADH structure was obtained from the RCSB Protein Data Bank  
183 (PDB ID: 7BU3), and the ligands ASP, GOL, and PEG were removed, chain B  
184 was selected as the single-chain structure. Due to the fact that the first amino  
185 acid residue of the B-chain of 7BU3 is Met 3, the sequence numbers of all amino  
186 acid residues were decreased by 2 to be consistent with the residue sequence  
187 numbers of *Ec*ADH. The *Ec*ADH<sup>M7</sup> structure was obtained from the prediction  
188 of alphafold2. The protonation states of charged residues were determined at  
189 constant pH 9.0 based on pKa calculations via the H++  
190 (<http://biophysics.cs.vt.edu/H++>) tool and the consideration of the local  
191 hydrogen bonding network. Residues H40, H162, H180 and H257 were  
192 assigned as HID, and H61, H96, H163, H187, H321 was assigned as HIE. All  
193 lysine and arginine residues were protonated, glutamic acid and aspartic acid  
194 residues were deprotonated. Residues C39 and C150 are coordinated with the  
195 catalytic Zn, so they are assigned as CYM. Similarly, C94, C97, C100 and C107  
196 are coordinated with the binding Zn and are also assigned as CYM.

197 The prepared protein was neutralized by adding counterions and solvated  
198 into a truncated octahedron TIP3P<sup>1</sup> water box with a 10 Å buffer distance on  
199 each side. After equilibrated with a series of minimizations interspersed by short  
200 MD simulations during which restrains on the protein backbone heavy atoms  
201 were gradually released (with force constant of 10, 2, 0.1 and 0 kcal/(mol·Å<sup>2</sup>)),  
202 the system was gradually heated up to 313K in 50 ps in which harmonic

203 potentials were used to positionally restrain the protein backbone heavy atoms  
204 (with force constant of 10 kcal/(mol·Å<sup>2</sup>)), and finally the standard unrestrained  
205 MD simulation with periodic boundary condition at 313K and 1 atm was carried  
206 out for up to 100 ns.

## 207 **Molecular docking**

208 In the equilibrium trajectories of *EcADH* and *EcADH*<sup>M7</sup> models, 2000  
209 snapshots were selected and divided into 10 groups using a hierarchical  
210 agglomerative (bottom-up) approach<sup>2</sup>. Then, the structure of **2a** was fully  
211 optimized at the B3LYP/6-31G(d) level using the Gaussian 16 package<sup>3</sup>.  
212 Molecular docking was conducted using the Lamarckian genetic algorithm local  
213 search method implemented in AutoDock 4.2 and AutoDockTools-1.5.6<sup>4</sup>. The  
214 docking procedure was performed with a rigid-receptor conformation. A total of  
215 100 independent docking runs were performed. Finally, appropriate  
216 conformations were selected as the binding conformations for the *EcADH-2a*  
217 MD simulations.

## 218 **Molecular dynamic simulations.**

219 All MD simulations were performed using AMBER 18<sup>5</sup>. The partial charges  
220 of **2a** were fitted with HF/6-31G(d) calculations, and the restrained electrostatic  
221 potential<sup>6</sup> protocol was implemented by the Antechamber module in the Amber  
222 18 package. The force field parameter for **2a** were adapted from that of the  
223 standard general amber force field 2.0 (gaff2)<sup>7</sup>, whereas the standard

224 Amber14SB force field was applied to describe the protein. Each system was  
225 initially neutralized with counterions and solvated with explicit TIP3P<sup>1</sup> water in  
226 a truncated octahedron box with a 10 Å buffer distance on each side. Each  
227 system was then equilibrated with a series of minimizations interspersed by  
228 short MD simulations during which restraints on the protein backbone heavy  
229 atoms were gradually released [with force constants of 10, 2, 0.1, and 0  
230 kcal/(mol·Å<sup>2</sup>)] and heated slowly from 0 to 313 K for 50 ps during which we  
231 applied a 10 kcal/(mol·Å<sup>2</sup>) restraint on the protein backbone heavy atoms.  
232 Finally, the standard unrestrained 100 ns MD simulations was performed at  
233 constant temperature and pressure. Pressure was maintained at 1 atm and  
234 coupled with isotropic position scaling. The temperature was controlled at 313  
235 K via the Berendsen thermostat method. Long-range electrostatic interactions  
236 were treated with the particle mesh Ewald<sup>8</sup> method and 12 Å cutoff was applied  
237 to both particle mesh Ewald and van der Waals interactions. A time step of 2 fs  
238 was employed along with the SHAKE algorithm for hydrogen atoms, and a  
239 periodic boundary condition was used. Atomic positions were stored every 2 ps  
240 for further analysis. Each system was checked for stability (structure, energy,  
241 and temperature fluctuations) and convergence (root-mean-square deviations,  
242 RMSD of structures).

243 **Supplementary Tables**

244 **Table S1. Comparison of the production performance of primary diamines by this study with those in relevant literatures.**

| Target product             |                    | Substrate       | Catalytic approach     | Titer (g/L) | Conversion (%)  | Productivity (g/(L·h)) | Reaction time (h) | Catalyst dosage (g <sub>CDW</sub> /L) | Ref                              |
|----------------------------|--------------------|-----------------|------------------------|-------------|-----------------|------------------------|-------------------|---------------------------------------|----------------------------------|
| Aliphatic primary diamines | 1,3-Diaminopropane | 1,3-Propanediol | Whole-cell             | 0.15        | 4               | 0.006                  | 24                | 12                                    | This study                       |
|                            |                    | Glucose         | Microbial fermentation | 13          | NA              | 0.19                   | 69                | NA                                    | Lee et al. <sup>9</sup> (2015)   |
|                            | 1,4-Diaminobutane  | 1,4-Butanediol  | Whole-cell             | 2.7         | 62              | 0.11                   | 24                | 12                                    | This study                       |
|                            |                    | Glucose         | Microbial fermentation | 42          | 52 <sup>c</sup> | 1.3                    | 34                | NA                                    | Lee et al. <sup>10</sup> (2017)  |
|                            | 1,5-Diaminopentane | 1,5-Pentanediol | Whole-cell             | 3.6         | 71              | 0.15                   | 24                | 12                                    | This study                       |
|                            |                    | Glucose         | Microbial fermentation | 104         | 53 <sup>c</sup> | 1.47                   | 65                | NA                                    | Joo et al. <sup>11</sup> (2018)  |
|                            | 1,6-Diaminohexane  | 1,6-Hexanediol  | Whole-cell             | 5.2         | 90              | 0.22                   | 24                | 12                                    | This study                       |
|                            |                    | L-lysine        | Microbial fermentation | 0.21        | 65              | 0.006                  | 36                | NA                                    | Wang et al. <sup>12</sup> (2024) |
|                            |                    | Cyclohexanol    | Whole-cell             | 0.49        | 42              | NA                     | NA                | 69                                    | Yun et al. <sup>13</sup> (2022)  |
|                            |                    | Cyclohexanol    | Whole-cell             | 1.7         | 73              | 0.07                   | 24                | 24                                    | Li et al. <sup>14</sup> (2023)   |
|                            | 1,7-Diaminoheptane | 1,7-Heptanediol | Whole-cell             | 5.5         | 84              | 0.23                   | 24                | 12                                    | This study                       |
|                            |                    | Cycloheptanol   | Whole-cell             | 0.46        | 35              | NA                     | NA                | 69                                    | Yun et al. <sup>13</sup> (2022)  |
|                            |                    | Cycloheptanol   | Whole-cell             | 1.6         | 81              | 0.066                  | 24                | 24                                    | Li et al. <sup>14</sup> (2023)   |

245

246 **Table S1 (Continued) Comparison of the production performance of primary diamines in this study with relevant literature.**

| Target product                |                                 | Substrate                     | Catalytic approach | Titer (g/L) | Conversion (%) | Productivity (g/(L·h)) | Reaction time (h) | Catalyst dosage (g <sub>CDW</sub> /L) | Ref                                  |
|-------------------------------|---------------------------------|-------------------------------|--------------------|-------------|----------------|------------------------|-------------------|---------------------------------------|--------------------------------------|
| Aliphatic primary diamines    | 1,8-Diaminooctane               | 1,8-Octanediol                | Whole-cell         | 6.3         | 87             | 0.26                   | 24                | 12                                    | This study                           |
|                               |                                 | Cyclooctanol                  | Whole-cell         | 0.32        | 22             | NA                     | NA                | 69                                    | Yun et al. <sup>13</sup> (2022)      |
|                               |                                 | Cyclooctanol                  | Whole-cell         | 1.7         | 79             | 0.071                  | 24                | 24                                    | Li et al. <sup>14</sup> (2023)       |
|                               |                                 | n-Octane                      | Whole-cell         | 0.50        | 35             | 0.008                  | 48                | NA                                    | Yun et al. <sup>15</sup> (2024)      |
|                               | 1,9-Diaminononane               | 1,9-Nonanediol                | Whole-cell         | 6.2         | 78             | 0.26                   | 24                | 12                                    | This study                           |
|                               |                                 | 1,9-Nonanediol                | Whole-cell         | 1.3         | 81             | 0.21                   | 6                 | 10.8                                  | Park et al. <sup>16</sup> (2024)     |
|                               | 1,4-Bis(aminomethyl)cyclohexane | 1,4-Cyclohexanedimethanol     | Whole-cell         | 23          | 77             | 0.95                   | 24                | 12                                    | This study                           |
|                               |                                 |                               |                    |             |                |                        |                   |                                       |                                      |
| Aromatic primary diamines     | <i>p</i> -Xylylenediamine       | <i>p</i> -Phenylenedimethanol | Whole-Cell         | 4.3         | 63             | 0.18                   | 24                | 12                                    | This study                           |
|                               |                                 | Terephthalic acid             | Purified enzyme    | 1.3         | 39             | 0.054                  | 24                | NA                                    | Kunjapur et al. <sup>17</sup> (2023) |
|                               | <i>m</i> -Xylylenediamine       | <i>m</i> -Phenylenedimethanol | Whole-Cell         | 3.5         | 51             | 0.147                  | 24                | 12                                    | This study                           |
| Heterocyclic primary diamines | 2,5-Bis(aminomethyl)furan       | 2,5-Furandimethanol           | Whole-Cell         | 1.1         | 17             | 0.044                  | 24                | 12                                    | This study                           |
|                               |                                 | 5-Hydroxymethylfurfural       | Purified enzyme    | 10.7        | 85             | 0.36                   | 30                | NA                                    | Yun et al. <sup>18</sup> (2024)      |

247 c : Calculated based on the yield g/g glucose. NA means no available data.

248

249 **Table S2. Substrate and product prices**<sup>a</sup>

| Brand                    | Country       | 1,6-Hexanediol (£/kg) | 1,4-Dicyanobutane (£/kg) | L-lysine (£/kg) | Cyclohexanol (£/kg) | 1,6-Diaminohexane (£/kg) | p-Phenylene dimethanol (£/kg) | Terephthalonitrile (£/kg) | Terephthalic acid (£/kg) | p-Xylylene diamine (£/kg) | 2,5-Furandimethanol (£/kg) | 5-hydroxymethylfurfural (£/kg) | 2,5-Bis(aminomethyl)furan (£/kg) |
|--------------------------|---------------|-----------------------|--------------------------|-----------------|---------------------|--------------------------|-------------------------------|---------------------------|--------------------------|---------------------------|----------------------------|--------------------------------|----------------------------------|
| Thermo Fisher Scientific | United States | 45.9                  | 68.3                     | NA              | 35.4                | 102.8                    | NA                            | NA                        | 44.1                     | NA                        | NA                         | NA                             | NA                               |
| Accel Scientific         | Spain         | 10.1                  | NA                       | 27              | 9.3                 | NA                       | 57.1                          | 35.3                      | 5.4                      | NA                        | 919                        | NA                             | NA                               |
| Aurum Pharmatech         | United States | 16.9                  | 64                       | 61.7            | 40.9                | 115                      | 74.2                          | 65.7                      | 9.6                      | 829                       | 1227                       | NA                             | 7319                             |
| Adamas                   | China         | 6.74                  | 19.2                     | 26.7            | 6.6                 | 17.1                     | 59.9                          | 22.5                      | 6.0                      | 1872                      | 924                        | 104                            | 9150                             |
| Energy Chemical          | China         | NA                    | 13                       | 24.2            | 6.5                 | 20.8                     | NA                            | 21.8                      | 5.2                      | 828                       | 993                        | 151                            | 8603                             |
| Meryer                   | China         | 13.9                  | 23.5                     | NA              | 5                   | 41.2                     | 77.8                          | 22.9                      | 6.7                      | 1846                      | 1006                       | 414                            | NA                               |
| Aladdin                  | China         | 19.3                  | 22.3                     | 29.2            | 4.2                 | 18.4                     | 78.8                          | 29.8                      | 6.7                      | 2184                      | 1085                       | 162                            | NA                               |
| Macklin                  | China         | 13.9                  | 23.8                     | 30.6            | 5.4                 | 41.1                     | 67.0                          | 22.9                      | 6.7                      | 1070                      | 982                        | 171                            | 12480                            |
| Average price            |               | 18.1                  | 33.4                     | 33.2            | 14.2                | 50.9                     | 69.1                          | 31.6                      | 11.3                     | 1438                      | 1019                       | 200                            | 9388                             |

250 <sup>a</sup>: The price was obtained from Scifinder and ChemSpider. NA means no available data.

251

252 **Table S3. Comparison of cost-effectiveness of our method with reported processes.**

| Target product and its price.          | Substrate                     | substrate cost*<br>£/(kg product) | Reaction conditions<br>(temperature, pressure). | Solvent                         | Titer<br>g/L | Conversion<br>% | Ref                                     |
|----------------------------------------|-------------------------------|-----------------------------------|-------------------------------------------------|---------------------------------|--------------|-----------------|-----------------------------------------|
| Aliphatic primary diamines :           | 1,6-Hexanediol                | 18.4                              | 40 °C<br>0.1 Mpa                                | Water                           | 5.5          | 90              | This study                              |
| 1,6-Diaminohexane<br>50.9 £/kg         | 1,4-Dicyanobutane             | 31.1                              | 100 °C<br>5 Mpa                                 | Ethanol                         | NA           | 85              | Liang et al <sup>19</sup><br>(2024)     |
|                                        | L-lysine                      | 41.8                              | 37 °C<br>0.1 Mpa                                | Water                           | 0.21         | 65              | Wang et al. <sup>12</sup><br>(2024)     |
|                                        | Cyclohexanol                  | 12.2                              | 25 °C<br>0.1 Mpa                                | Water                           | 1.68         | 73              | Li et al. <sup>6</sup> (2023)           |
| Aromatic primary diamines :            | <i>p</i> -Phenylenedimethanol | 70.2                              | 40 °C<br>0.1 Mpa                                | Water                           | 4.3          | 63              | This study                              |
| <i>p</i> -Xylylenediamine<br>1438 £/kg | Terephthalonitrile            | 29.7                              | 70 °C<br>5 Mpa                                  | Toluene                         | NA           | 97~99           | Patent <sup>20</sup>                    |
|                                        | Terephthalic acid             | 13.8                              | 30 °C<br>0.1 Mpa                                | Water with<br>5% (v/v)<br>DMSO  | 1.3          | 39              | Kunjapur et al. <sup>17</sup><br>(2023) |
| Heterocyclic primary diamines:         | 2,5-Furandimethanol           | 1035.6                            | 40 °C<br>0.1 Mpa                                | water                           | 1.05         | 17              | This study                              |
| 2,5-Bis(aminomethyl)furan<br>9388 £/kg | 5-hydroxymethylfurfural       | 200.4                             | 20~37 °C<br>0.1 Mpa                             | Water with<br>10% (v/v)<br>DMSO | 10.7         | 85              | Yun et al. <sup>18</sup><br>(2024)      |

253 \*: Calculate the substrate cost per kilogram of product based on 100% conversion yield. NA means no available data.



255 **Table S4. Candidate ADHs.**

| Enzyme        | Sources                                | Uniprot<br>ID | 1a       |                      |                                        | 2a       |                      |                                        |
|---------------|----------------------------------------|---------------|----------|----------------------|----------------------------------------|----------|----------------------|----------------------------------------|
|               |                                        |               | $K_m$    | $k_{cat}$            | $k_{cat}/K_m$                          | $K_m$    | $k_{cat}$            | $k_{cat}/K_m$                          |
|               |                                        |               | [mM]     | [min <sup>-1</sup> ] | [min <sup>-1</sup> ·mM <sup>-1</sup> ] | [mM]     | [min <sup>-1</sup> ] | [min <sup>-1</sup> ·mM <sup>-1</sup> ] |
| <i>EcADH</i>  | <i>Escherichia coli</i> .              | P27250(*)     | 7.3±0.5  | 262.0±4.2            | 36.2                                   | 14.3±2.6 | 42.2±0.1             | 3.0                                    |
| <i>SynADH</i> | <i>Synechocystis</i> sp. PCC 6803      | P74721        | 7.3±2.2  | 89.4±7.8             | 12.6                                   | 11.2±2.7 | 8.1±0.1              | 0.7                                    |
| <i>GtADH</i>  | <i>Geobacillus thermodenitrificans</i> | A4ISB9        | 6.3±0.4  | 60.6±4.8             | 9.6                                    | 7.4±0.3  | 18.6±0.1             | 2.9                                    |
| <i>PpADH</i>  | <i>Pelophylax perezii</i> .            | O57380        | 6.6±0.7  | 44.2±1.2             | 6.6                                    | 3.9±0.8  | 3.3±0.1              | 0.8                                    |
| <i>AciADH</i> | <i>Acinetobacter</i> sp. NCIMB9871     | Q9F7D8        | 19.3±4.7 | 6.8±0.4              | 0.4                                    |          | n.d.                 |                                        |
| <i>AaADH</i>  | <i>Aedes aegypti</i> .                 | D2WKD9        |          | n.d.                 |                                        |          | n.d.                 |                                        |
| <i>HeADH</i>  | <i>Halomonas elongata</i> .            | E1V3M3        |          | n.d.                 |                                        |          | n.d.                 |                                        |
| <i>AcADH</i>  | <i>Acinetobacter calcoaceticus</i>     | Q59096        |          | n.d.                 |                                        |          | n.d.                 |                                        |

256 P27250(\*): The amino acid sequence of *EcADH* is obtained by truncating the Met1 and Ser2 residues at the N-terminus of the sequence based on P27250. Data  
257 represent the mean ± SD from three replicates. n.d. means not detected.

258 **Table S5. Plasmids and strains.**

| Plasmid     | Description                                       | Source  |
|-------------|---------------------------------------------------|---------|
| pET-28a(+)  | single T7 promoters, pBR322 ori, Kan <sup>R</sup> | Novagen |
| pRSFDuet-1  | Double T7 promoters, RSF ori, Kan <sup>R</sup>    | Novagen |
| pETDuet-1   | Double T7 promoters, pBR322 ori, Amp <sup>R</sup> | Novagen |
| pCDFDuet-1  | Double T7 promoters, CDF13 ori, Str <sup>R</sup>  | Novagen |
| pACYCDuet-1 | Double T7 promoters, p15A ori, Cm <sup>R</sup>    | Novagen |

259

| Strain                    | Description                                                                                                    | source     |
|---------------------------|----------------------------------------------------------------------------------------------------------------|------------|
| <i>E. coli</i> BL21 (DE3) | <i>F-ompT gal dcm lon hsdSB (rB- mB-) λ(DE3 [lacI lacUV5-T7 gene 1 ind1 sam7 nin5])</i>                        | Invitrogen |
| <i>E. coli</i> A01        | pACYCDuet-1 carrying ScGluDH and EcADH                                                                         | This study |
| <i>E. coli</i> A02        | pACYCDuet-1 carrying ScGluDH and EcADHM7                                                                       | This study |
| <i>E. coli</i> B01        | pET-28a(+) carrying EcPaTAF91Y                                                                                 | This study |
| <i>E. coli</i> B02        | pET-28a(+) carrying EcPaTAW4                                                                                   | This study |
| <i>E. coli</i> C01        | pACYCDuet-1 carrying ScGluDH and EcADH <sup>M7</sup> , pET-28a(+) carrying EcPaTA <sup>W4</sup>                | This study |
| <i>E. coli</i> C02        | pRSFDuet-1 carrying EcPaTA <sup>W4</sup> (MCS-1) and EcADH <sup>M7</sup> (MCS-2), pACYCDuet-1 carrying ScGluDH | This study |
| <i>E. coli</i> C03        | pRSFDuet-1 carrying EcPaTA <sup>W4</sup> (MCS-2) and EcADH <sup>M7</sup> (MCS-1), pACYCDuet-1 carrying ScGluDH | This study |
| <i>E. coli</i> C04        | pETDuet-1 carrying EcPaTA <sup>W4</sup> (MCS-1) and EcADH <sup>M7</sup> (MCS-2), pACYCDuet-1 carrying ScGluDH  | This study |
| <i>E. coli</i> C05        | pETDuet-1 carrying EcPaTA <sup>W4</sup> (MCS-2) and EcADH <sup>M7</sup> (MCS-1), pACYCDuet-1 carrying ScGluDH  | This study |
| <i>E. coli</i> C06        | pCDFDuet-1 carrying EcPaTA <sup>W4</sup> (MCS-1) and EcADH <sup>M7</sup> (MCS-2), pACYCDuet-1 carrying ScGluDH | This study |
| <i>E. coli</i> C07        | pCDFDuet-1 carrying EcPaTA <sup>W4</sup> (MCS-2) and                                                           | This study |



261 **Table S6. Primer sequences.**

| Name             | Function                                                                                                                                         | Sequence (5'→3')                                                   |
|------------------|--------------------------------------------------------------------------------------------------------------------------------------------------|--------------------------------------------------------------------|
| MCS1-F           | Inverse PCR to amplify the linearized vector pRSFDuet-1, pETDuet-1, pCDFDuet-1, and pACYCDuet-1 with the Multiple Cloning Site 1 (MCS1) removed. | GCATAATGCTTAAGTCG                                                  |
| MCS1-R           |                                                                                                                                                  | ATTCGGATCCTGGCTGTG<br>G                                            |
| MCS2-F           | Inverse PCR to amplify the linearized vector pRSFDuet-1, pETDuet-1, pCDFDuet-1, and pACYCDuet-1 with the Multiple Cloning Site 2 (MCS2) removed. | CAGCTTAATTAACCTAGG<br>C                                            |
| MCS2-R           |                                                                                                                                                  | CTTATACTTAACTAATATA<br>C                                           |
| MCS1-<br>GluDH-F | The <i>ScGluDH</i> with homologous arms of MCS1 can be amplified.                                                                                | <u>ACAGCCAGGATCCGAATA</u><br>TGTCAGAGCCTGAG                        |
| MCS1-<br>GluDH-R |                                                                                                                                                  | <u>CGACTTAAGCATTATGCTT</u><br>AGAAAACATCACCTTGG                    |
| MCS1-<br>ADH-F   | The <i>EcADH</i> with homologous arms of MCS1 can be amplified.                                                                                  | <u>ACAGCCAGGATCCGAATA</u><br>TGATTAAATCCTATGC                      |
| MCS1-<br>ADH-R   |                                                                                                                                                  | <u>CGACTTAAGCATTATGCTT</u><br>AATAATCAGCTTTAAGAAC<br>G             |
| MCS2-<br>ADH-F   | The <i>EcADH</i> with homologous arms of MCS2 can be amplified.                                                                                  | <u>ATTAGTTAAGTATAAGAAG</u><br><u>GAGATATAATGATTAAATC</u><br>CTATGC |
| MCS2-<br>ADH-R   |                                                                                                                                                  | <u>TAGGTTAATTAAGCTGTTA</u><br>ATAATCAGCTTTAAGAAC<br>G              |
| MCS1-<br>TA-F    | The <i>EcPaTA</i> with homologous arms of MCS1 can be amplified.                                                                                 | <u>ACAGCCAGGATCCGAATA</u><br>TGAACCGTCTGCCGTC                      |
| MCS1-<br>TA-R    |                                                                                                                                                  | <u>CGACTTAAGCATTATGCTT</u><br>AAGCTTCTTCTACAG                      |
| MCS2-<br>TA-F    | The <i>EcPaTA</i> with homologous arms of MCS2 can be amplified.                                                                                 | <u>ATTAGTTAAGTATAAGAAG</u><br><u>GAGATATAATGAACCGTC</u><br>TGCC    |
| MCS2-<br>TA-R    |                                                                                                                                                  | <u>TAGGTTAATTAAGCTGTTA</u><br>AGCTTCTTCTACAG                       |

262

263 **Table S7. Mutant library of *EcADH* M1 variants.**

| Region | Mutant                                                                       |
|--------|------------------------------------------------------------------------------|
| Loop 1 | E49S, E49T, E49R, E49K, E49H, E49D, E49N, E49Q, E49G, E49V, E49M, E49C       |
|        | W50F, W50C                                                                   |
|        | G51S, G51D, G51K                                                             |
|        | <b>F52D, F52E, F52N</b> , F52Q, F52W, F52L, F52S, F52T, F52K, F52R, F52H     |
| Loop 2 | Q105E                                                                        |
|        | I106D, I106E, <b>I106N, I106Q</b> , I106K, I106H, I106A, I106L, I106S, I106T |
|        | A112L, <b>A112I</b> , A112P, A112T, A112N, A112Q, A112D                      |
|        | P114L, P114I, P114G, P114A                                                   |
| Loop N | S198T                                                                        |
|        | N238C, N238S, N238D                                                          |
|        | <b>T258L, T258S</b> , T258E, T258Q, T258R                                    |
|        | A261L, A261H, A261D, A261Q, A261R                                            |
|        | V262P                                                                        |
|        | L263D, L263E                                                                 |
|        | T264I, T264E, T264V, T264D                                                   |
|        | S267E, <b>S267K, S267R</b>                                                   |
|        | S283D, S283N, S283T                                                          |
|        | A284L, A284S, A284G                                                          |
|        | T285I, T285V, T285H                                                          |

264 Note: Beneficial mutants are highlighted in red.

265

266 **Table S8. Mutant library of *EcADH* M6 variants.**

| TemplateRegion |        | Mutant                                                     |
|----------------|--------|------------------------------------------------------------|
|                |        | S53T, S53C, S53M, S53P                                     |
| M5             | Loop 1 | Q54F, Q54T, Q54S, Q54P, Q54K, Q54M, Q54G, Q54A, Q54C       |
|                |        | Y55F, Y55V, Y55L, Y55S, Y55T, Y55C, Y55H, Y55D, Y55M, Y55Q |

267 Note: Beneficial mutants are highlighted in red.

268

269 **Table S9. Mutant library of *Ec*ADH M7 variants.**

| Template | Region | Mutant                                                           |
|----------|--------|------------------------------------------------------------------|
|          |        | G88V, G88A, G88C                                                 |
| M6       | Loop 3 | W89C, W89Y, W89T                                                 |
|          |        | T90S, T90D, T90E, T90N, T90F, T90A, T90V, T90L, A91G, A91V, A91I |

270 Note: Beneficial mutants are highlighted in red.

271

272 **Table S10. Mutant library of EcPaTA variants.**

|         | Mutant                                                                                                                                                   |
|---------|----------------------------------------------------------------------------------------------------------------------------------------------------------|
| Round 1 | W1/F84Y, W1/S149T, W1/S153A, W1/F180Y, W1/S184T, W1/N214D, W1/L351E, W1/F370L, W1/A384V, W1/A416L, W1/T424V, W1/L433I, W1/F84Y/S184T(W3)                 |
| Round 2 | W3/Q119N, W3/N148Q, W3/T151S, W3/V154A, W3/V154L, W3/H181K, W3/H181R, W3/V273A, W3/V273L, W3/T275S, W3/A299V, W3/A299G, W3/L419V, W3/L419I(W4), W3/R426K |

273 Note: Beneficial mutants are highlighted in red.



274 **Supplementary Figures**

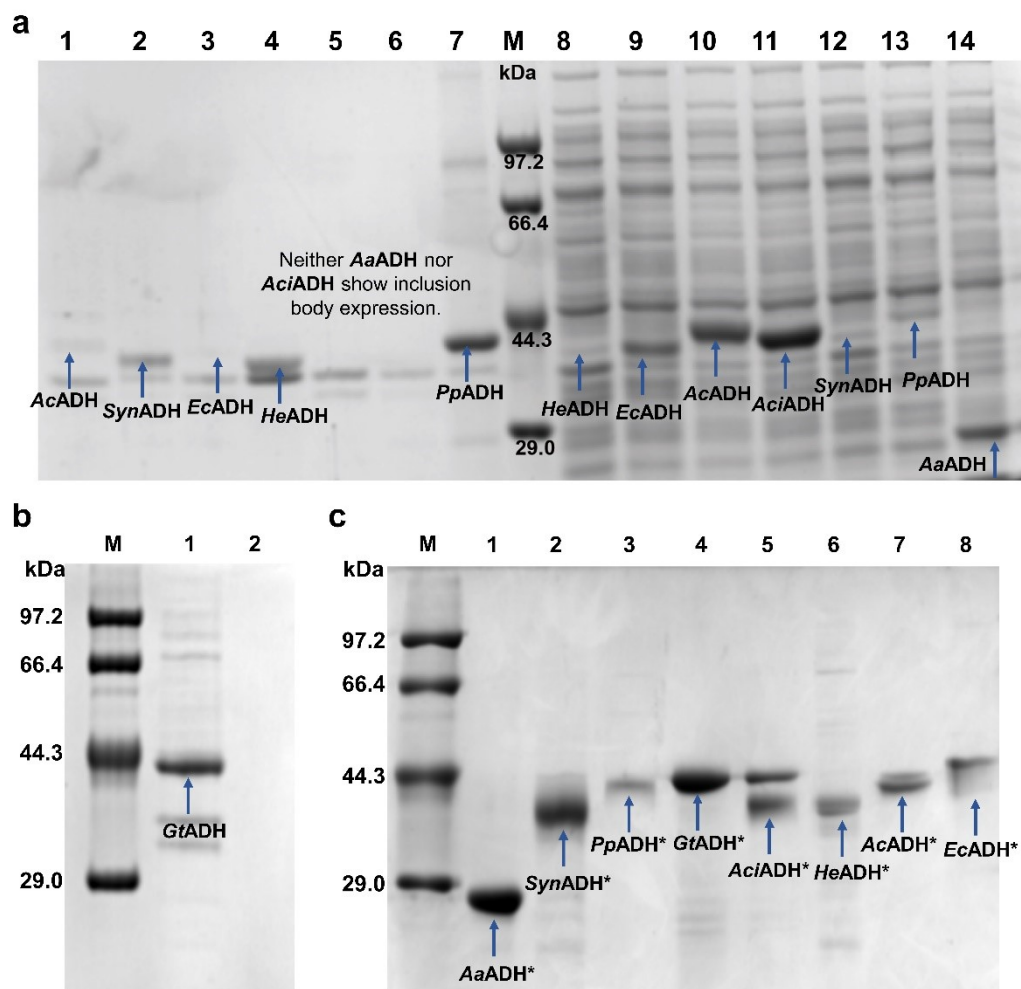

275

276 **Figure S1. SDS-PAGE of eight candidate ADHs.**

277 (a) The lanes for protein pellets are arranged as follows: AcADH, SynADH, EcADH, HeADH,  
278 AaADH, AciADH, PpADH. The lanes for protein supernatants are arranged as follows: HeADH,  
279 EcADH, AcADH, AciADH, SynADH, PpADH, AaADH. Lane M represents the protein marker; (b)  
280 Lane 1: GtADH supernatant; lane 2: GtADH pellet; (c) SDS-PAGE of the purified enzymes. Lane  
281 1: AaADH, lane 2: SynADH, lane 3: PpADH, lane 4: GtADH, lane 5: AciADH, lane 6: HeADH, lane  
282 7: AcADH, lane 8: EcADH. The asterisk (\*) indicates enzymes carrying an N-terminal 6xHis tag.

283

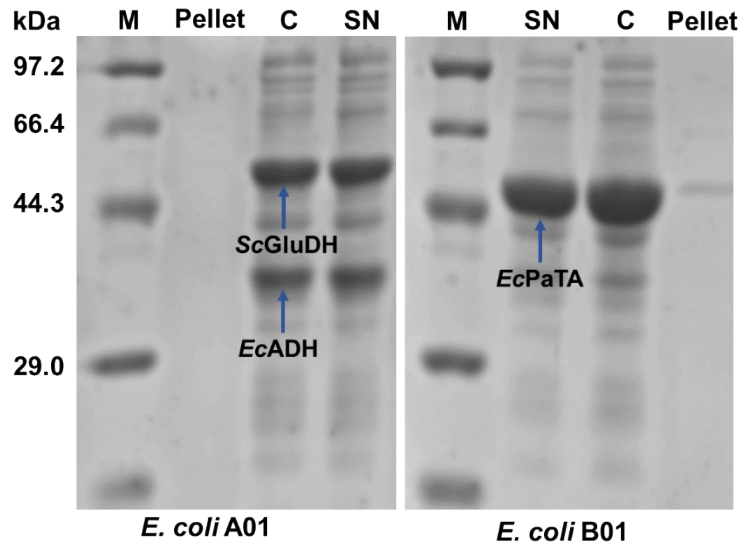

284

285 **Figure S2. SDS-PAGE of *E. coli* A01 and *E. coli* B01.**

286 Lane M represents protein marker, lane C represents whole cells, lane SN represents the  
 287 supernatant, and lane Pellet represents pellet.

288

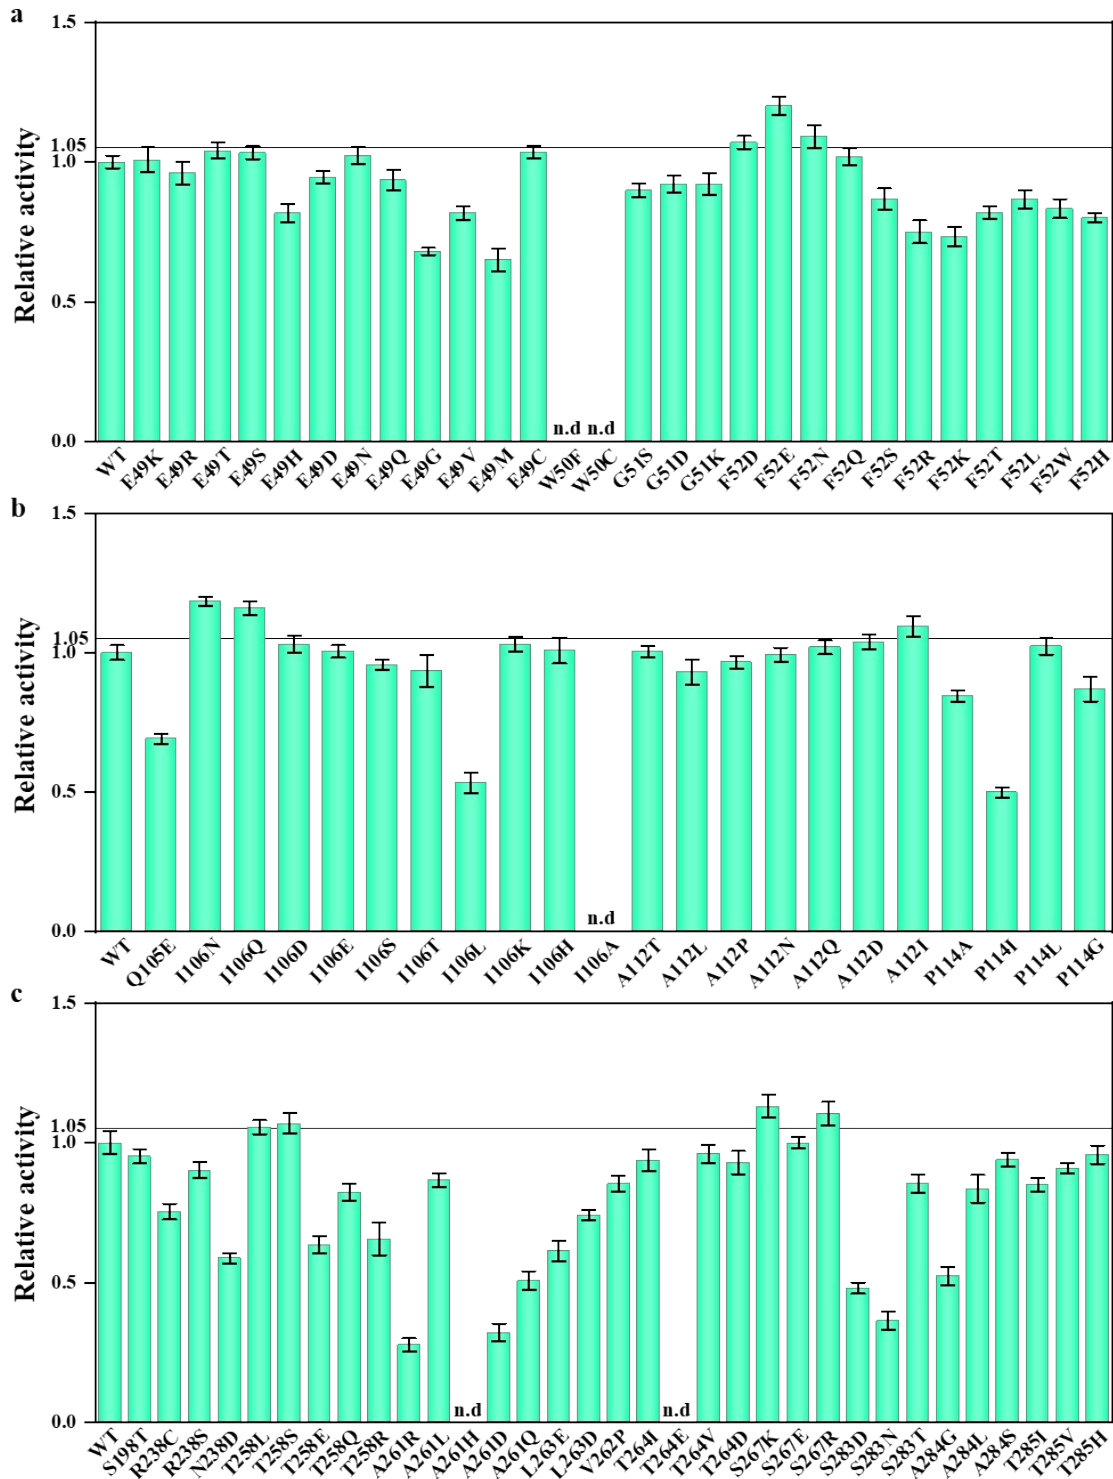

**Figure S3. The single mutants of EcADH.**

Conversion conditions: 10 g/L **1a**, 100 mM HEPES, 20 mM L-Glu, 200 mM ammonium formate, 0.5 mM PLP, 2 mM NADP<sup>+</sup>, and 0.5 mM Co<sup>2+</sup>. Reactions were carried out with 6 g/L CDW of *E. coli* A01 expressing ADH mutants and 6 g/L CDW of *E. coli* B01 at pH 9.0 and 40°C for 24 h. *n.d.* indicates **2c** product was not detected. Error bars indicate standard deviation of three independent replicates. Data represent the mean  $\pm$  SD from three replicates.

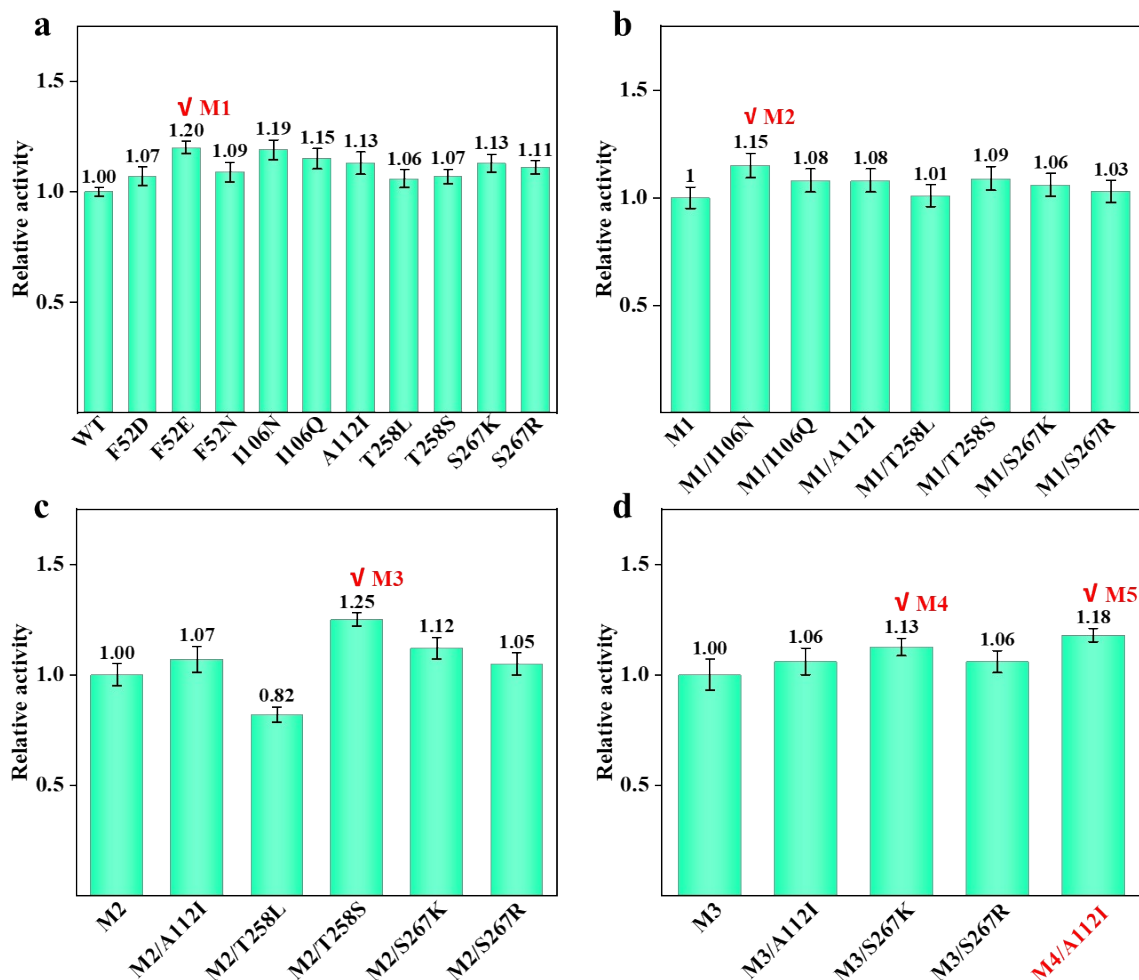

**Figure S4. Mutants of *EcADH*(M1-M5).**

(a) Beneficial single mutants with 10 g/L **1a** and 200 mM ammonium formate. (b) Beneficial double mutants with 10 g/L **1a** and 200 mM ammonium formate. (c) Beneficial triple mutants with 20 g/L **1a** and 400 mM ammonium formate. (d) Beneficial quadruple mutants with 30 g/L **1a** and 500 mM ammonium formate. Conversion conditions: 10-30 g/L **1a**, 50 mM HEPES, 20 mM L-Glu, 200–500 mM ammonium formate, 0.5 mM PLP, 2 mM NADP<sup>+</sup>, and 0.5 mM Co<sup>2+</sup>. Reactions were conducted with 6 g/L CDW of *E. coli* A01 or *EcADH* mutants and 6 g/L CDW of *E. coli* B01 at pH 9.0 and 40°C for 24 h. Error bars indicate standard deviation of three independent replicates. Data represent the mean  $\pm$  SD from three replicates.

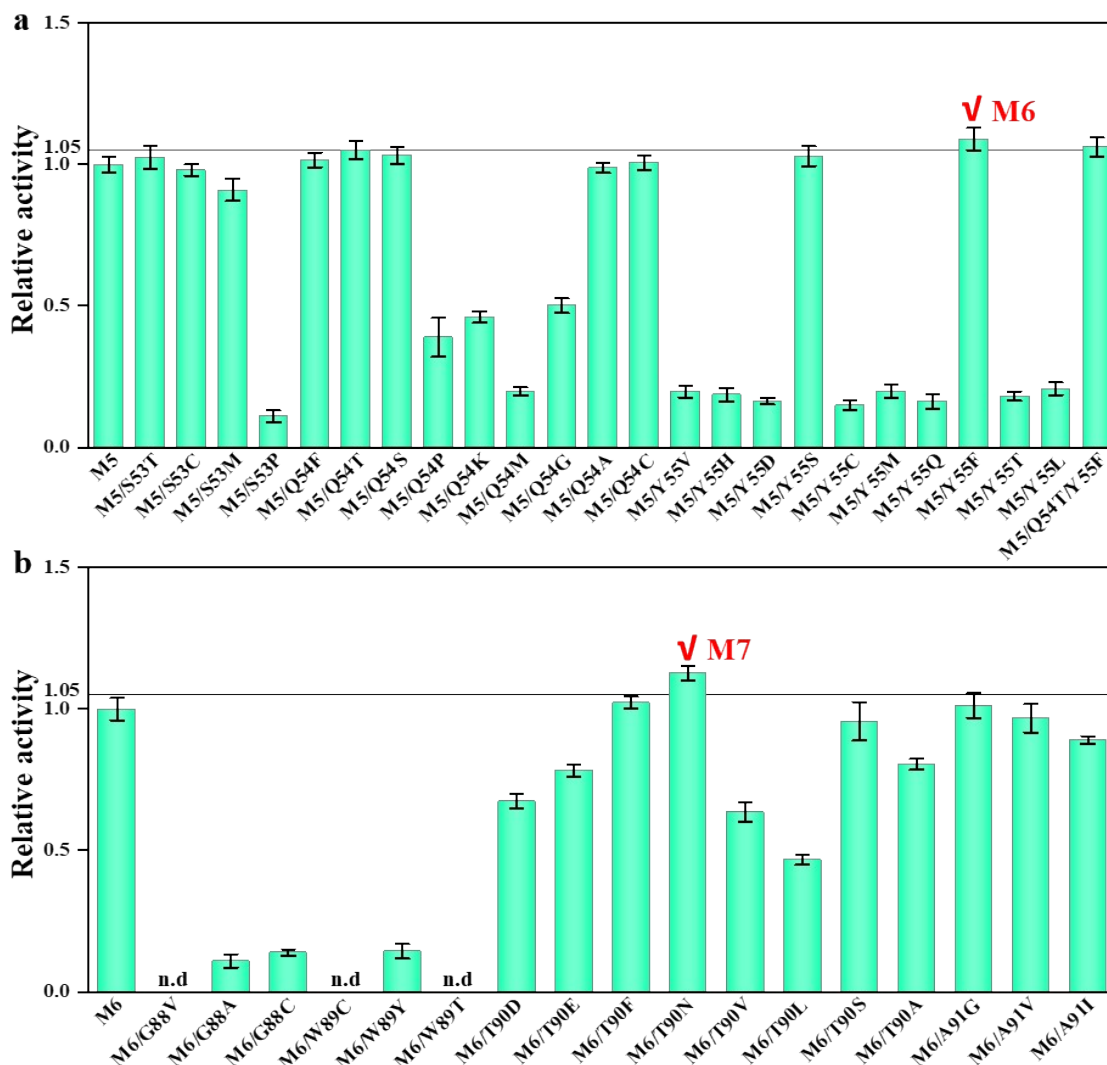

**Figure S5. Mutants of *EcADH*(M1-M7).**

(a) M6 mutants of *EcADH*. (b) M7 mutants of *EcADH*. Conversion conditions: 30 g/L **1a**, 50 mM HEPES, 20 mM L-Glu, 500 mM ammonium formate, 0.5 mM PLP, 2 mM NADP<sup>+</sup>, and 0.5 mM Co<sup>2+</sup>. Reactions were conducted with 6 g/L CDW of *E. coli* A01 or *EcADH* mutants and 6 g/L CDW of *E. coli* B01 at pH 9.0 and 40°C for 24 h. n.d. indicates **2c** product was not detected. Error bars indicate standard deviation of three independent replicates. Data represent the mean  $\pm$  SD from three replicates.

316

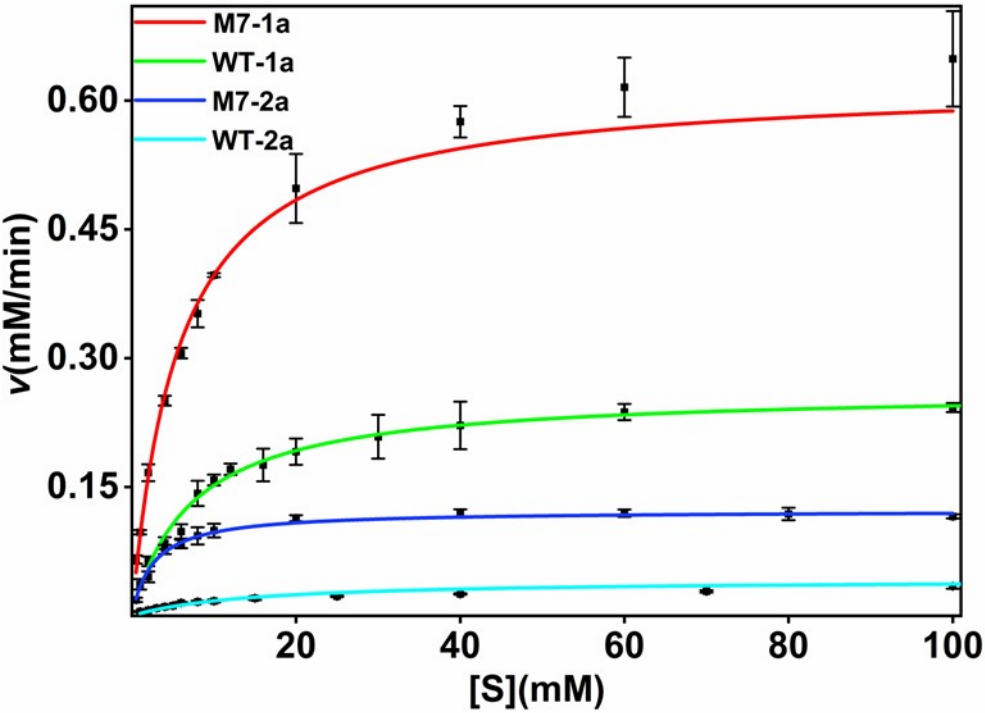

317

318 **Figure S6. Kinetic parameters of *EcADH* wild-type (WT) and its mutant M7.**

319 Error bars indicate standard deviation of three independent replicates. Data represent the mean  $\pm$   
320 SD from three replicates.



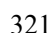

323 *EcPaTA* (PDB: 4UOX), *AcOAT* (PDB: 1VEF), *OAT* (PDB: 2OAT), *GABA-AT* (PDB: 1SFF),  
324 *BsDAPA-AT* (PDB: 1SFF), *ScDAPA-AT* (Uniprot: P50277).

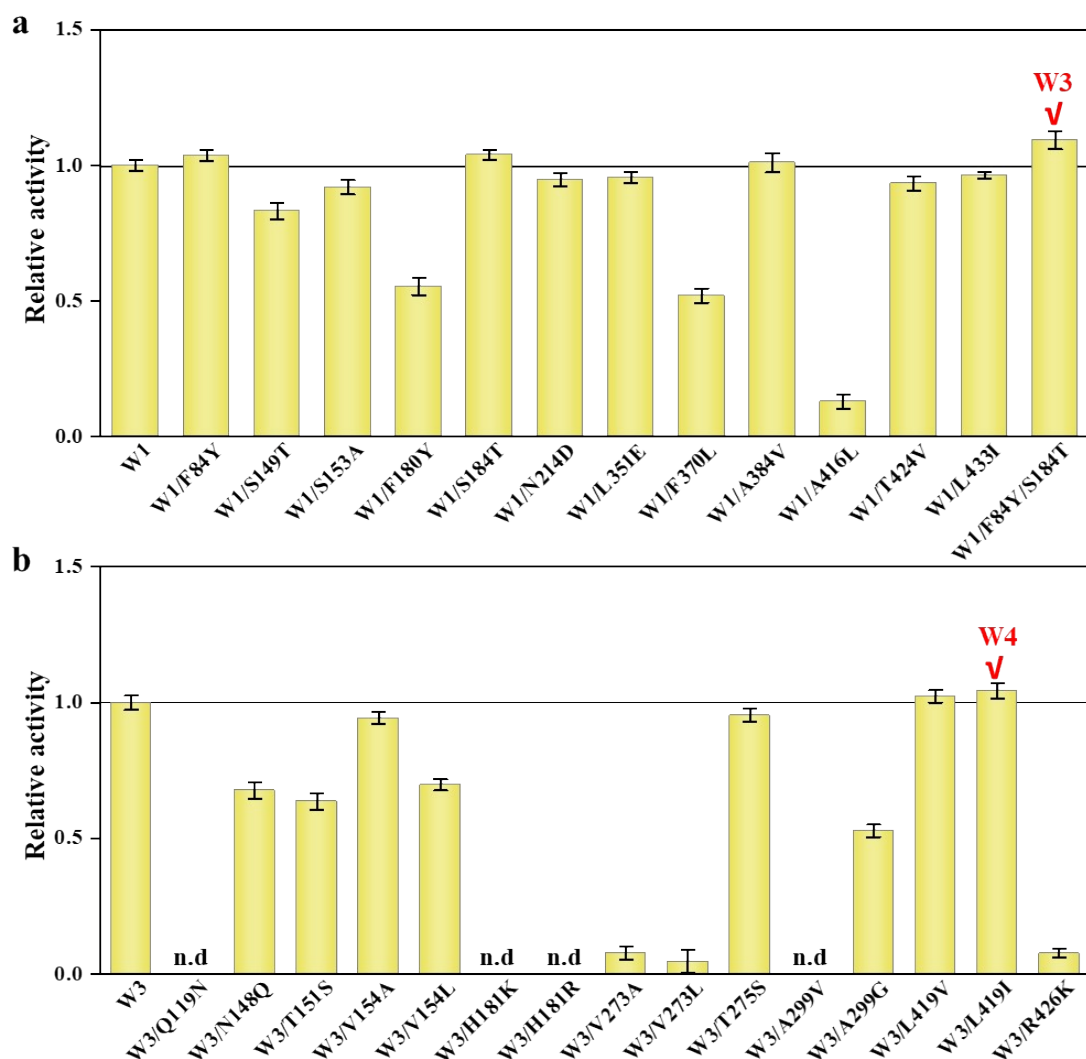

**Figure S8. Mutants of *EcPaTA*<sup>F91Y</sup>.**

(a) The first-round mutants. (b) The second-round mutants. Conversion conditions: 30 g/L **1a**, 50 mM HEPES, 20 mM L-Glu, 500 mM ammonium formate, 0.5 mM PLP, 2 mM NADP<sup>+</sup>, and 0.5 mM Co<sup>2+</sup>. Reactions were conducted with 6 g/L CDW of *E. coli* A02 and 30 g/L CDW of *E. coli* B01 or expressing transaminase mutants at pH 9.0 and 40°C for 24 h. n.d. indicates **2c** product was not detected. Error bars indicate standard deviation of three independent replicates. Data represent the mean  $\pm$  SD from three replicates.



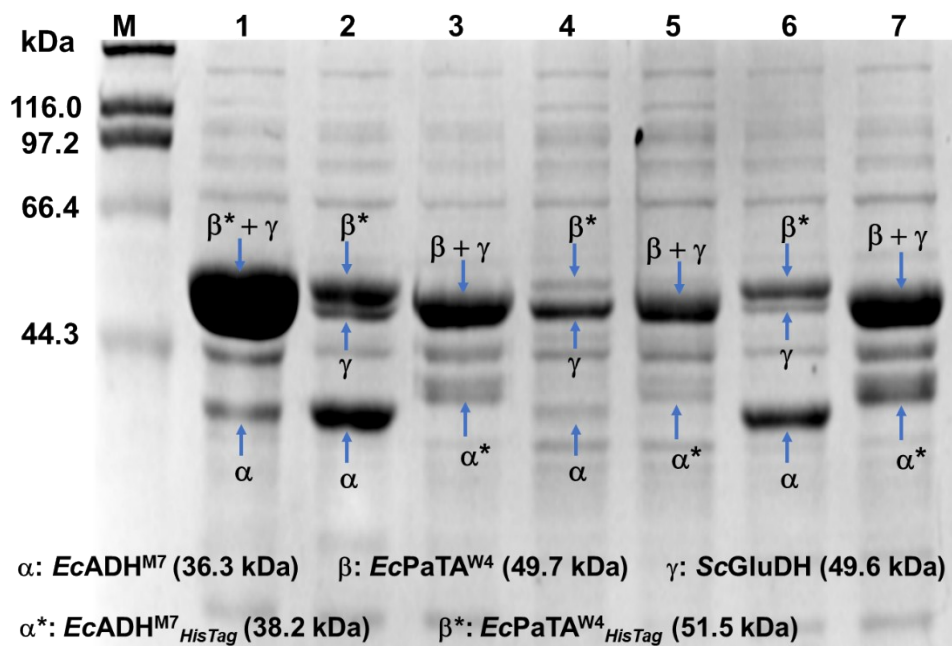

334

335 **Figure S9. SDS-PAGE of the recombinant strain *E. coli* C01-C07.**

336 Lane M represents protein marker, lanes 1-7 correspond to the cell lysate supernatants of *E. coli*  
 337 C01–C07, respectively.  $\alpha$ : *EcADH*<sup>M7</sup> (36.3 kDa);  $\beta$ : *EcPaTA*<sup>W4</sup> (49.7 kDa);  $\gamma$ : *ScGluDH* (49.6 kDa);  
 338  $\alpha^*$ : *EcADH*<sup>M7</sup><sub>HisTag</sub> (38.2 kDa);  $\beta^*$ : *EcPaTA*<sup>W4</sup><sub>HisTag</sub> (51.5 kDa). The asterisk (\*) indicates enzymes  
 339 carrying an N-terminal 6×His tag.

340

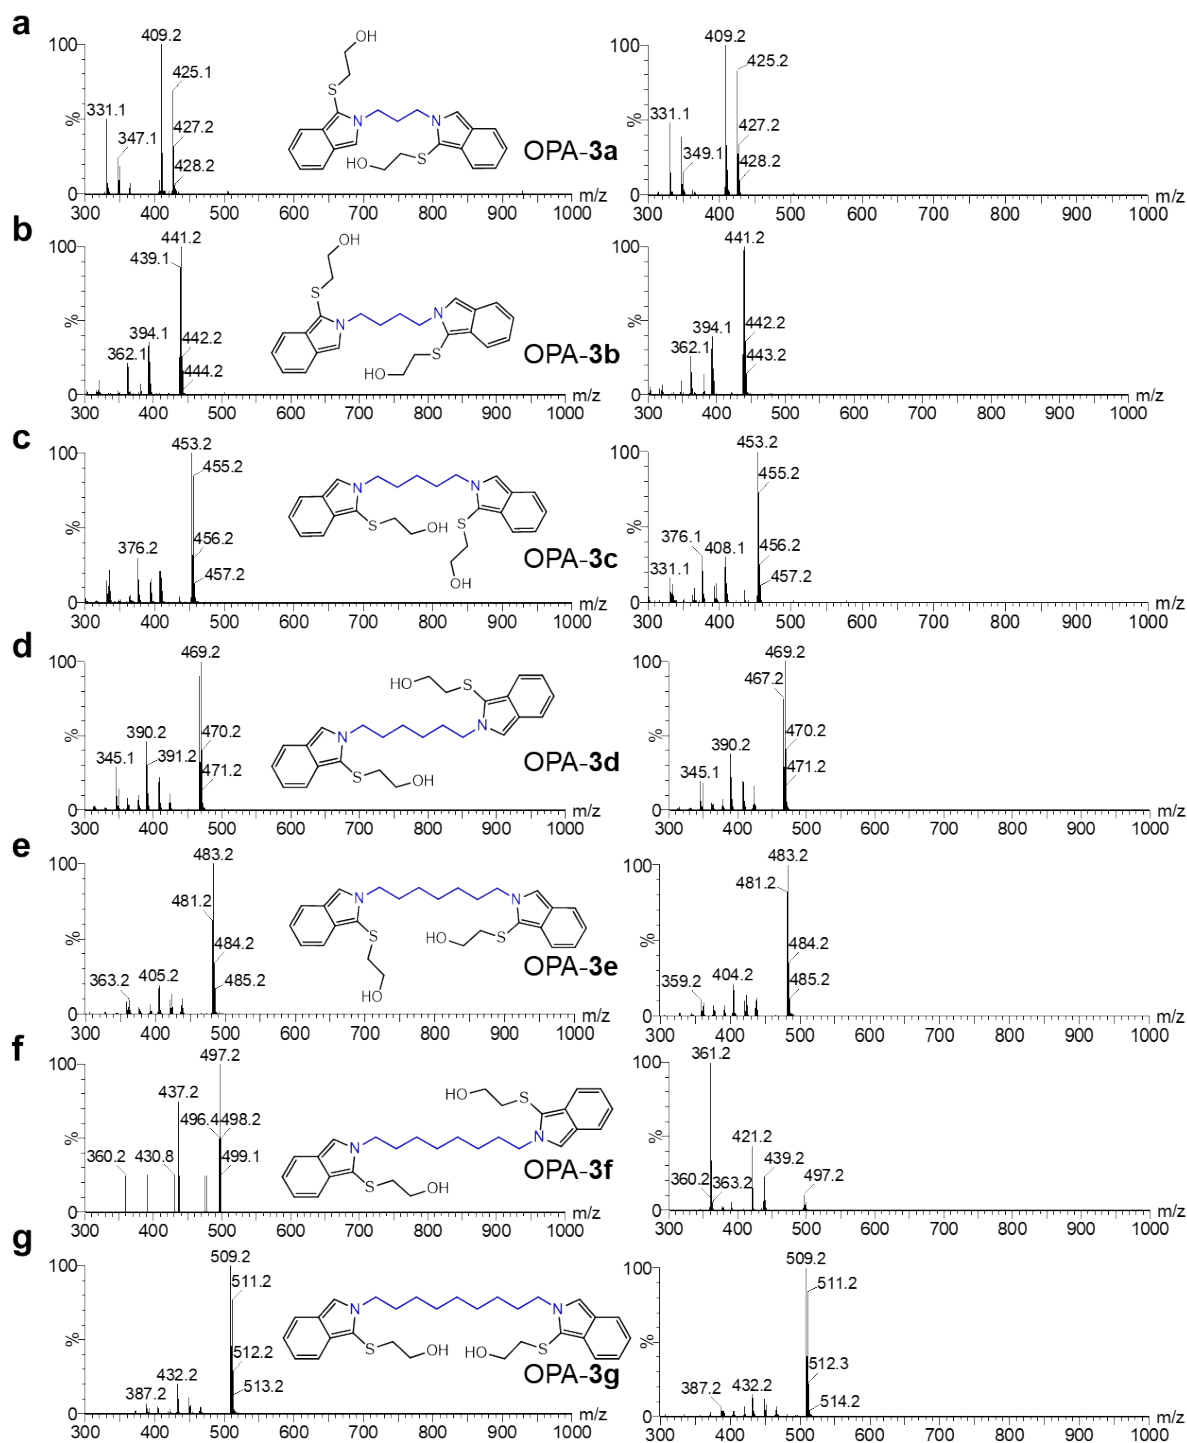

**Figure S10. LC-MS spectra of OPA-3a to OPA-3g.**

The spectrum on the left represents the standard sample, while the one on the right represents the reaction sample. (a) OPA-3a,  $[M+H]^+ = 427.14$ . (b) OPA-3b,  $[M+H]^+ = 441.16$ . (c) OPA-3c,  $[M+H]^+ = 455.17$ . (d) OPA-3d,  $[M+H]^+ = 469.19$ . (e) OPA-3e,  $[M+H]^+ = 483.21$ . (f) OPA-3f,  $[M+H]^+ = 497.22$ . (g) OPA-3g,  $[M+H]^+ = 511.24$ .

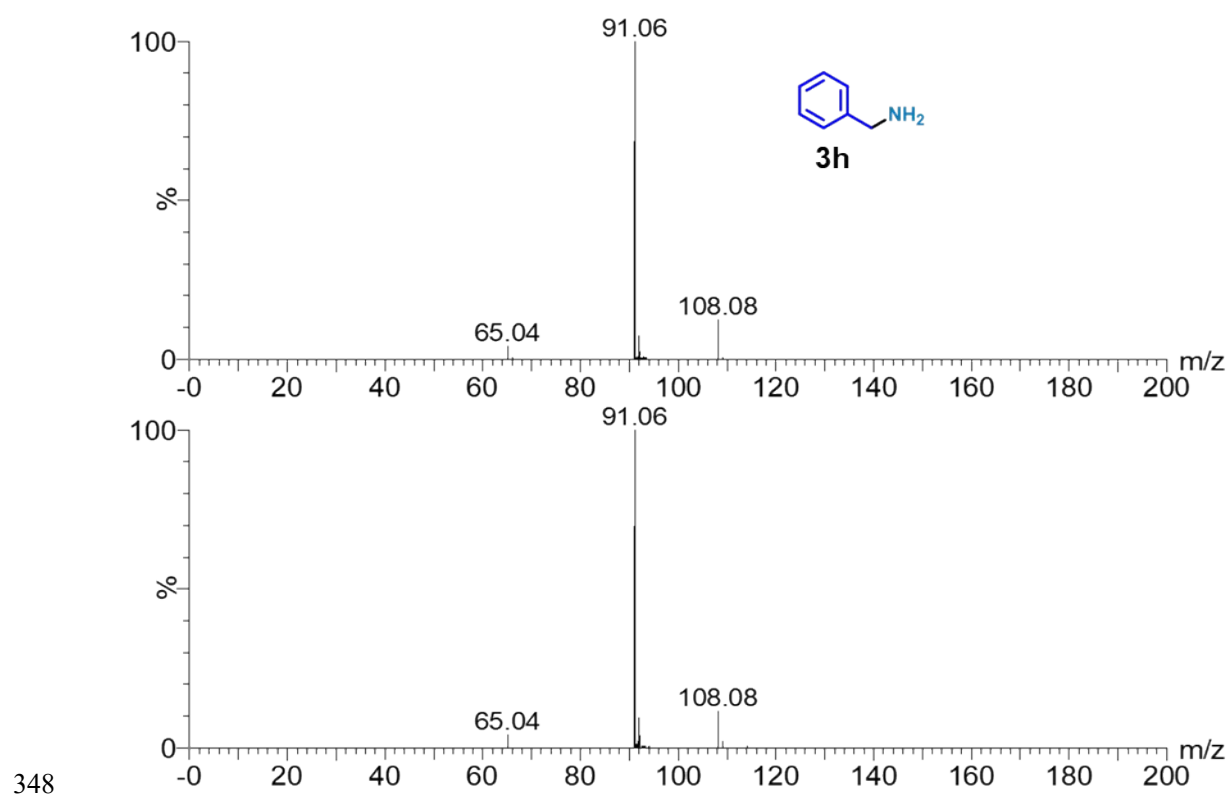

349 **Figure S11. LC-MS spectra of 3h.**

350 The spectrum above represents the standard sample, while the one below represents the

351 reaction sample.  $[M+H]^+=108.07$ .

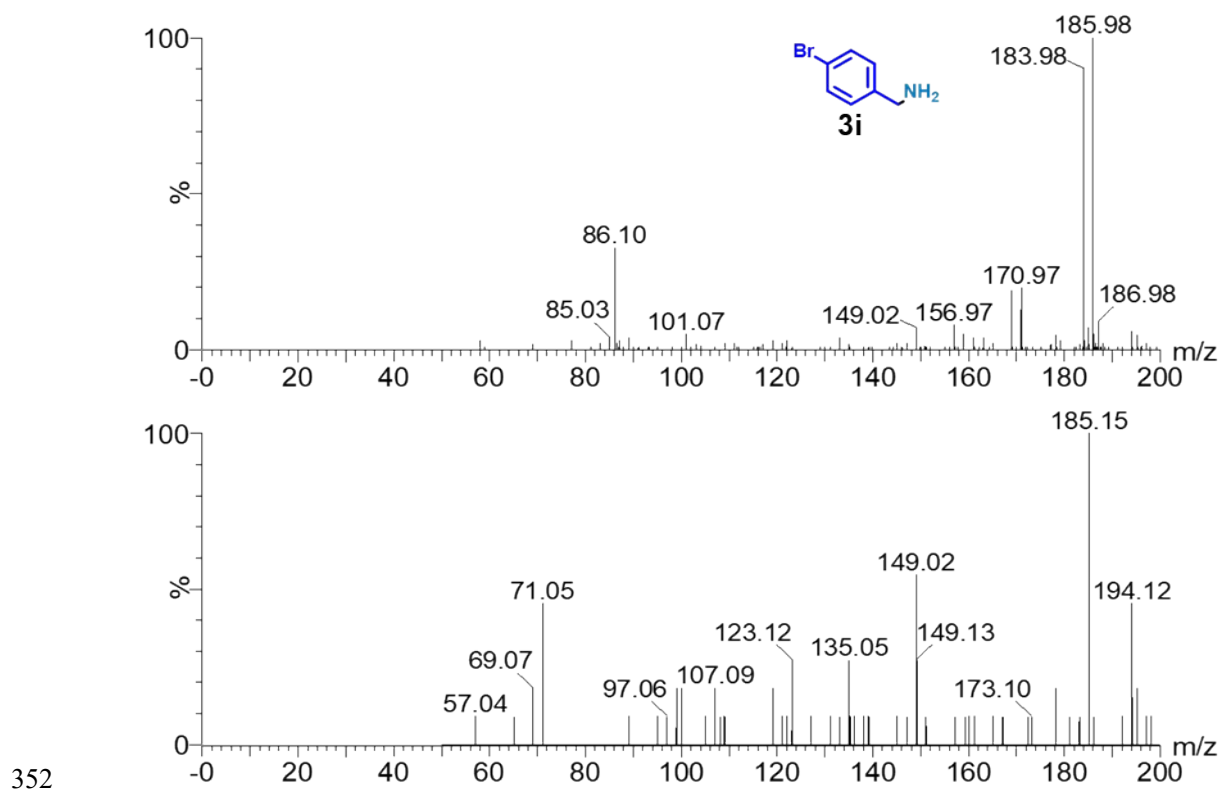

353 **Figure S12. LC-MS spectra of 3i.**

354 The spectrum above represents the standard sample, while the one below represents the

355 reaction sample.  $[M+H]^+=185.98$ .

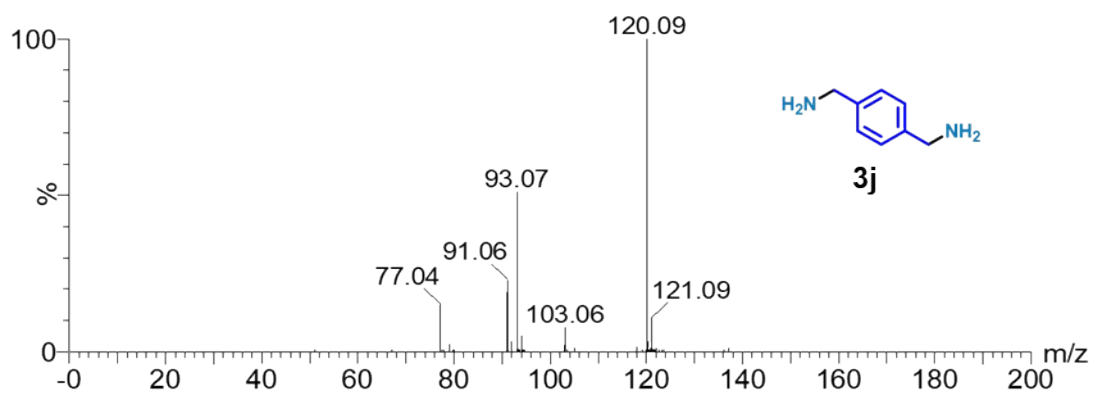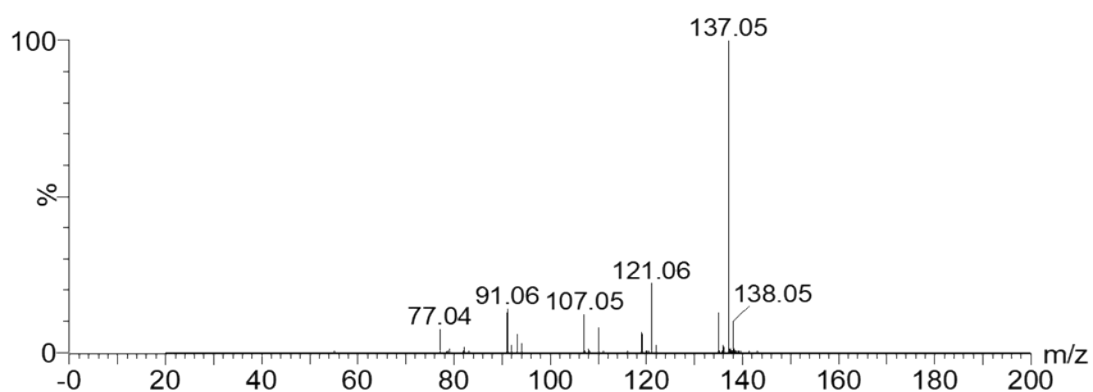

357 **Figure S13. LC-MS spectra of 3j.**

358 The spectrum above represents the standard sample, while the one below represents the  
 359 reaction sample.  $[M+H]^+=137.10$ .

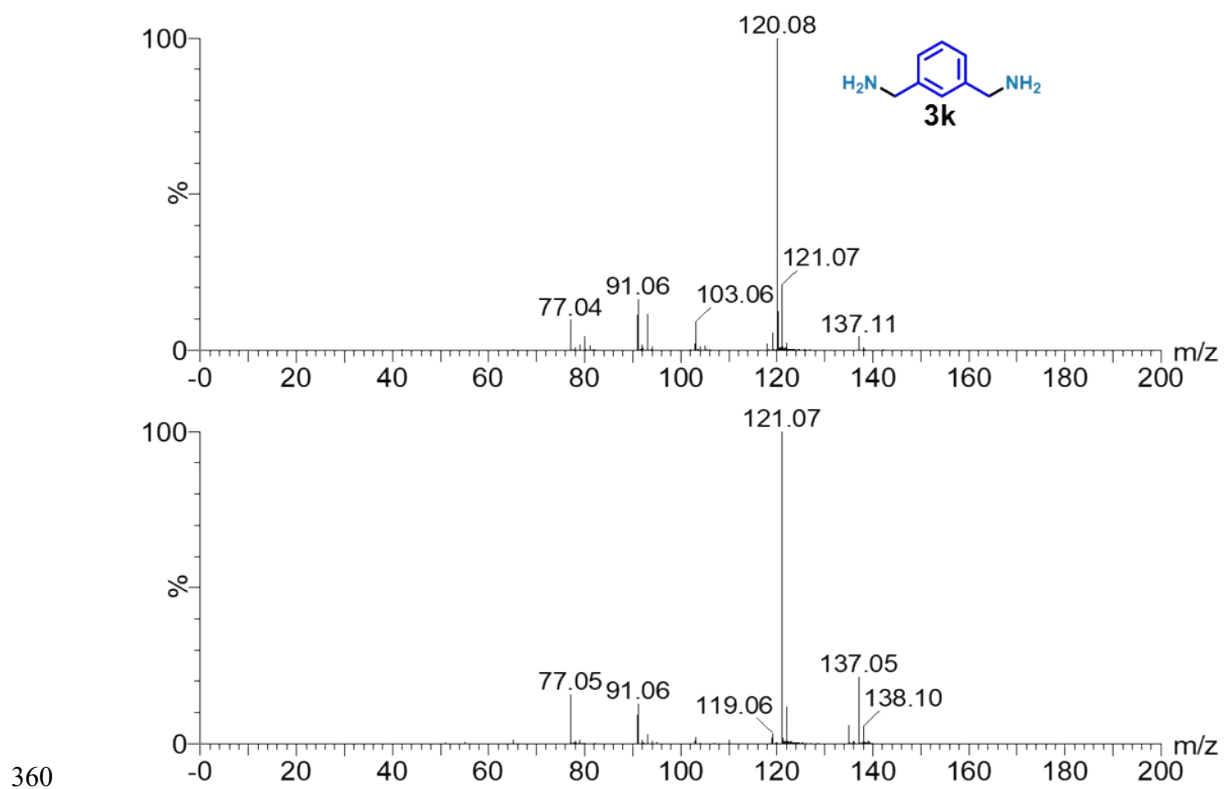

361 **Figure S14. LC-MS spectra of 3k.**

362 The spectrum above represents the standard sample, while the one below represents the  
363 reaction sample.  $[M+H]^+=137.10$ .

364

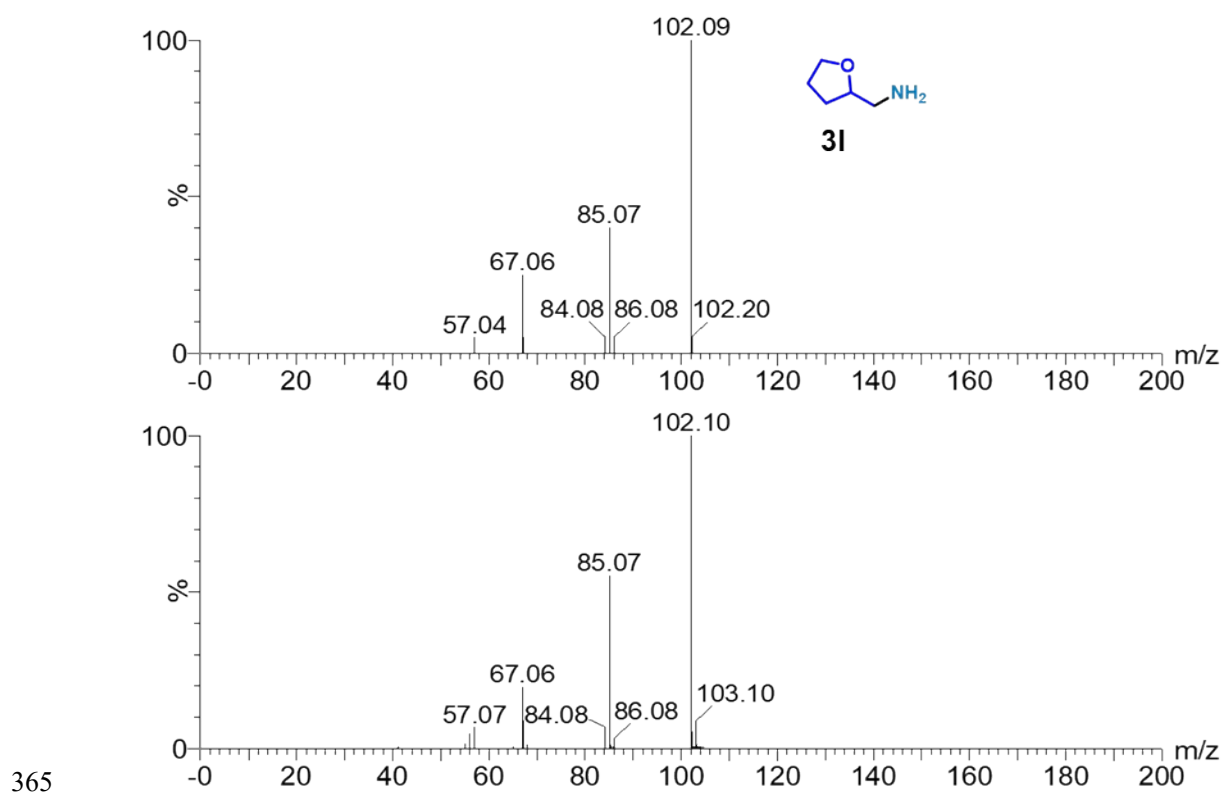

366 **Figure S15. LC-MS spectra of 3l.**

367 The spectrum above represents the standard sample, while the one below represents the  
 368 reaction sample.  $[M+H]^+=102.08$ .

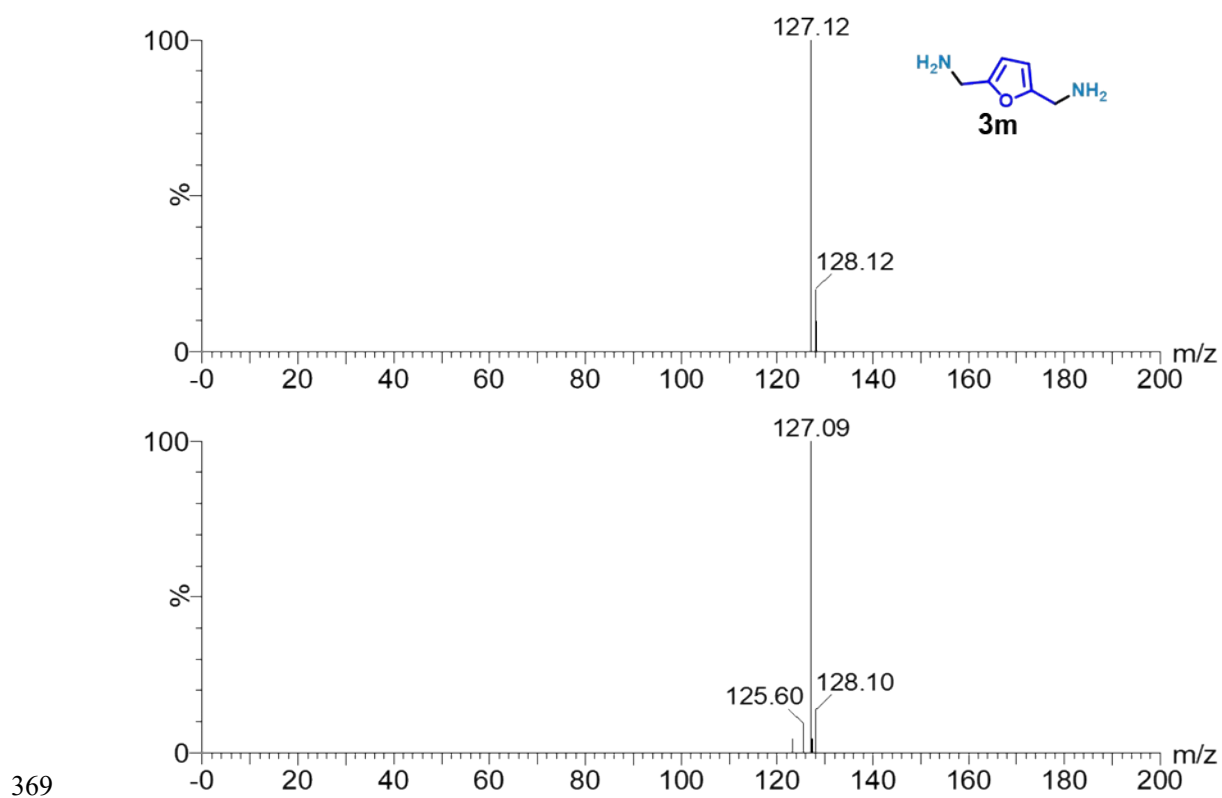

370 **Figure S16. LC-MS spectra of 3m.**

371 The spectrum above represents the standard sample, while the one below represents the  
372 reaction sample.  $[M+H]^+=127.08$ .

373



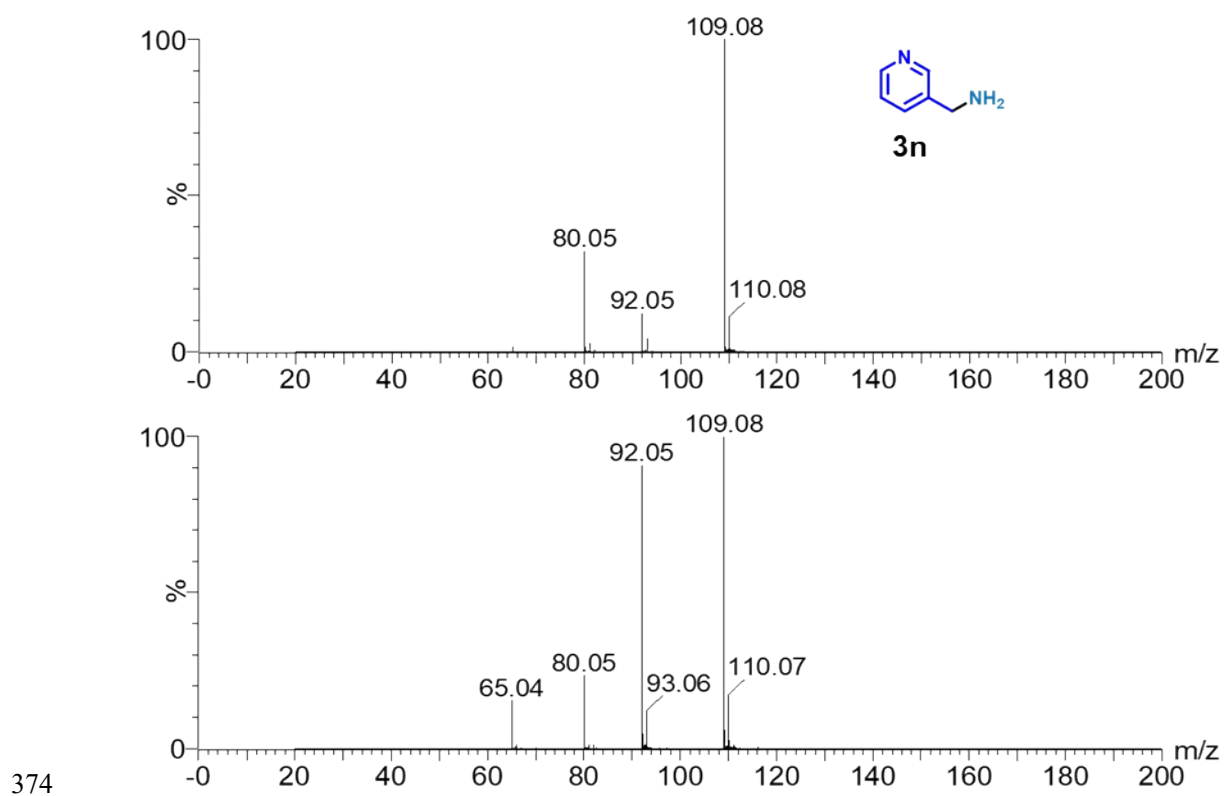

375 **Figure S17. LC-MS spectra of 3n.**

376 The spectrum above represents the standard sample, while the one below represents the

377 reaction sample.  $[M+H]^+=109.08$ .

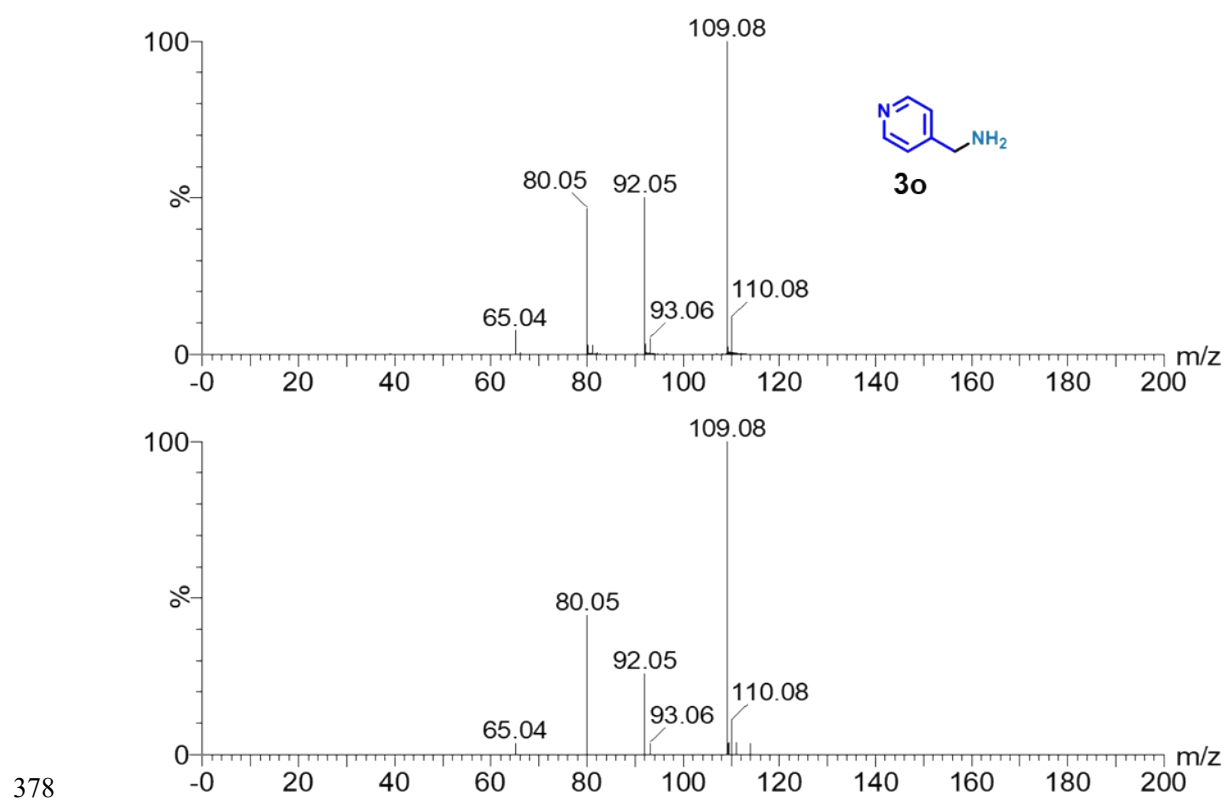

379 **Figure S18. LC-MS spectra of 3o.**

380 The spectrum above represents the standard sample, while the one below represents the

381 reaction sample.  $[M+H]^+=109.07$ .

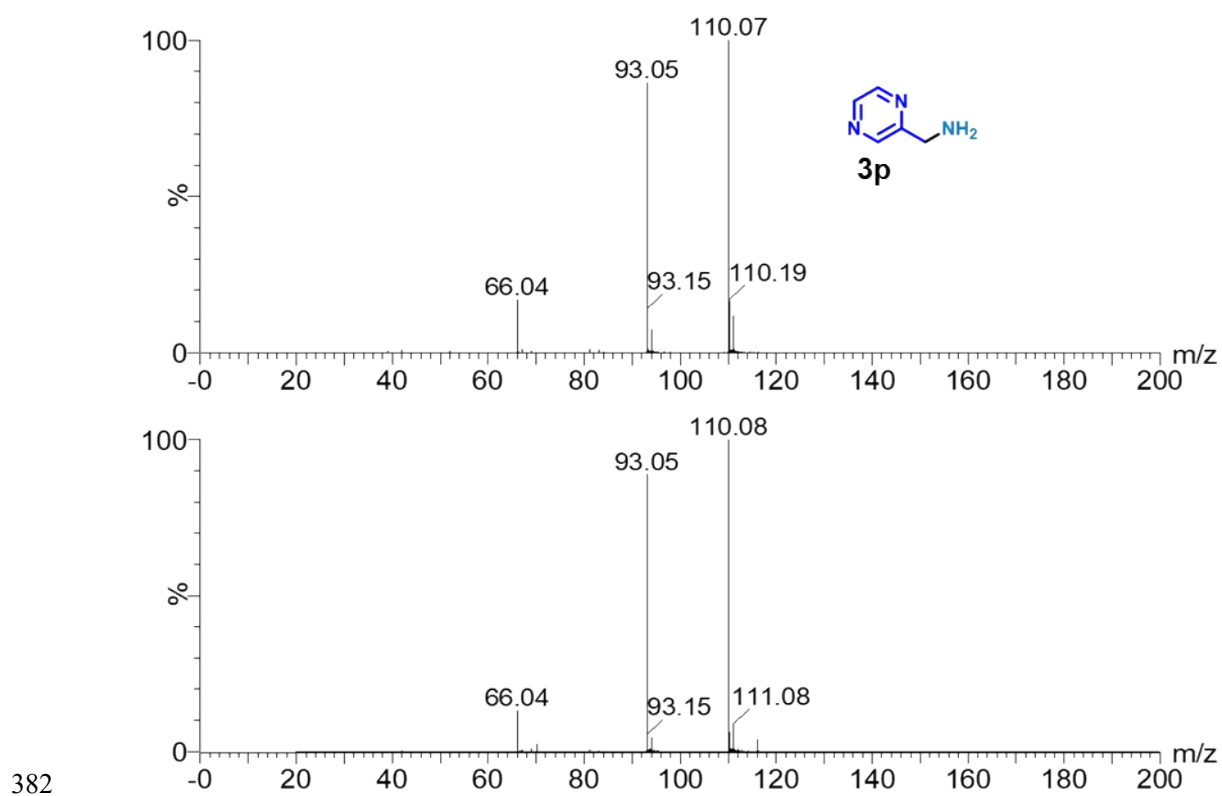

383 **Figure S19. LC-MS spectra of 3p.**

384 The spectrum above represents the standard sample, while the one below represents the

385 reaction sample.  $[M+H]^+=110.06$ .

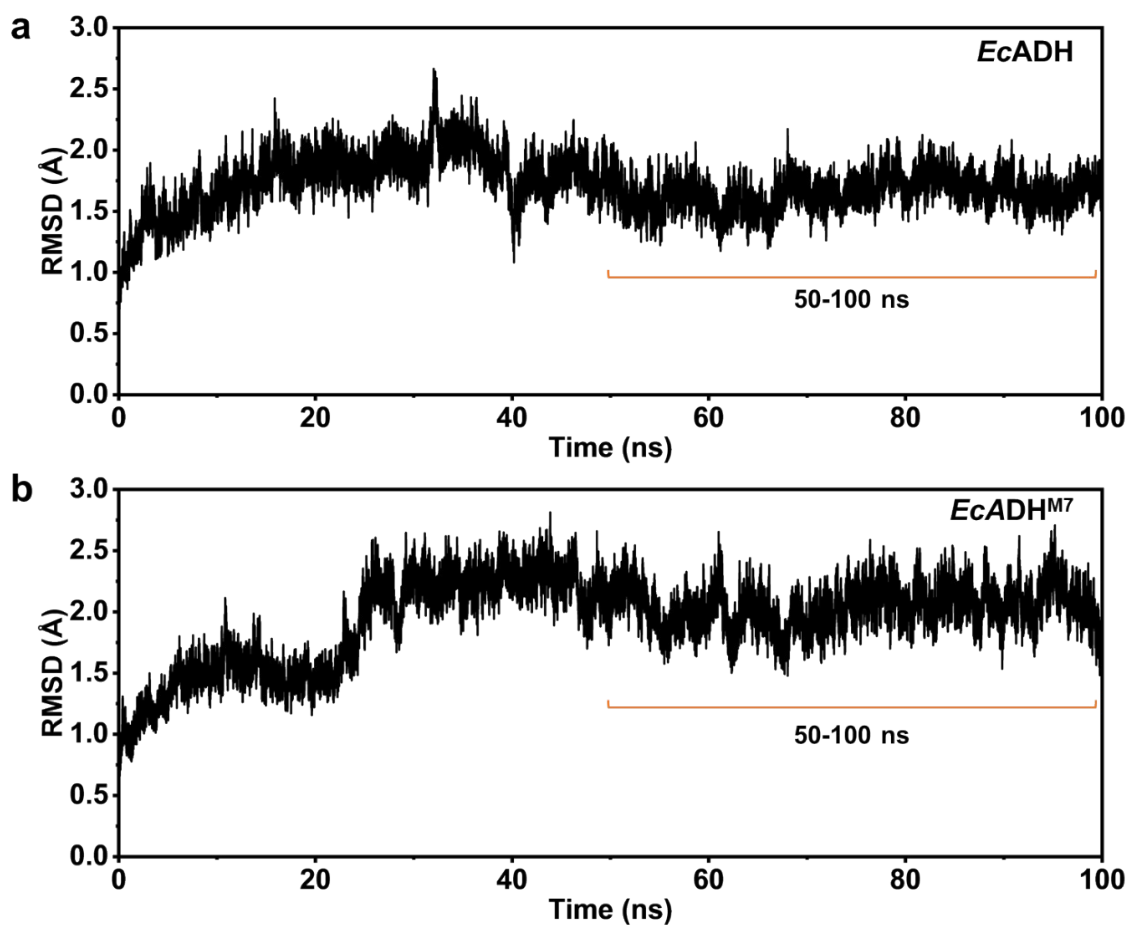

386

387 **Figure S20. Root-mean-square deviation (RMSD) of backbone heavy atoms relative to the**  
 388 **first snapshot during 100 ns MD simulation of *EcADH* and *EcADH<sup>M7</sup>*.**

389 (a) *EcADH*-NADP<sup>+</sup>-**2a** ternary complex and (b) *EcADH<sup>M7</sup>*-NADP<sup>+</sup>-**2a** ternary complex. During the  
 390 50-100 ns period, the system remains in a stable phase.

391

## 392 Reference

- 393 1. Jorgensen, W.L., Chandrasekhar, J., Madura, J.D., Impey, R.W., and Klein, M.L..  
 394 Comparison of simple potential functions for simulating liquid water. *J. Chem.*  
 395 *Phys.* **1983**, 79, 926-935.
- 396 2. Frisch, M.J., Trucks, G.W., Schlegel, H.B., Scuseria, G.E., Robb, M.A.,  
 397 Cheeseman, J.R., Scalmani, G., Barone, V., Petersson, G.A., Nakatsuji, H., et al.  
 398 *Gaussian 16 Rev. C.01.* **2016**
- 399 3. Morris, G.M., Goodsell, D.S., Halliday, R.S., Huey, R., Hart, W.E., Belew, R.K. and  
 400 Olson, A.J., Automated docking using a Lamarckian genetic algorithm and an  
 401 empirical binding free energy function. *J. Comput. Chem.* **1998**, 19: 1639-1662.
- 402 4. Morris, G. M., Huey, R., Lindstrom, W., Sanner, M. F., Belew, R. K., Goodsell, D.  
 403 S., & Olson, A. J.. AutoDock4 and AutoDockTools4: Automated docking with  
 404 selective receptor flexibility. *J. Comput. Chem.* **2009**, 30(16), 2785–2791.
- 405 5. Case, D., Ben-Shalom, I., Brozell, S.R., Cerutti, D.S., Cheatham, T., Cruzeiro,  
 406 V.W.D., Darden, T., Duke, R., Ghoreishi, D., Gilson, M., et al. *Amber 2018.* **2018**
- 407 6. Jakalian, A., Jack, D. B., & Bayly, C. I., Fast, efficient generation of high-quality  
 408 atomic charges. AM1-BCC model: II. Parameterization and validation. *J. Comput.*  
 409 *Chem.* **2002**, 23(16), 1623–1641.
- 410 7. Wang, J., Wolf, R. M., Caldwell, J. W., Kollman, P. A., & Case, D. A., Development  
 411 and testing of a general amber force field. *J. Comput. Chem.* **2004**, 25(9), 1157–  
 412 1174.
- 413 8. Darden, T., York, D., and Pedersen, L., Particle mesh Ewald: An N·log(N) method  
 414 for Ewald sums in large systems. *J. Chem. Phys.* **1993**, 98, 10089-10092.
- 415 9. Chae, T. U.; Kim, W. J.; Choi, S.; Park, S. J.; Lee, S. Y., Metabolic engineering of  
 416 *Escherichia coli* for the production of 1,3-diaminopropane, a three carbon diamine.  
 417 *Sci. Rep.* **2015**, 5 (1), 13040.
- 418 10. Noh, M.; Yoo, S. M.; Kim, W. J.; Lee, S. Y., Gene expression knockdown by  
 419 modulating synthetic small rna expression in *Escherichia coli*. *Cell Syst.* **2017**, 5  
 420 (4), 418-426.e4.

- 421 11. Kim, H. T.; Baritugo, K.-A.; Oh, Y. H.; Hyun, S. M.; Khang, T. U.; Kang, K. H.;  
422 Jung, S. H.; Song, B. K.; Park, K.; Kim, I.-K.; Lee, M. O.; Kam, Y.; Hwang, Y. T.;  
423 Park, S. J.; Joo, J. C., Metabolic engineering of *Corynebacterium glutamicum* for  
424 the high-Level production of cadaverine that can be used for the synthesis of  
425 biopolyamide 510. *ACS Sustainable Chem. Eng.* **2018**, 6 (4), 5296-5305.
- 426 12. Xiao, K.; Wang, D.; Liu, X.; Kang, Y.; Luo, R.; Hu, L.; Peng, Z., Novel  
427 bioproduction of 1,6-hexamethylenediamine from L-lysine based on an artificial  
428 one-carbon elongation cycle. *ACS Omega* **2024**, 9 (39), 40970-40979.
- 429 13. Sarak, S.; Pagar, A. D.; Khobragade, T. P.; Jeon, H.; Giri, P.; Lim, S.; Patil, M. D.;  
430 Kim, Y.; Kim, B. G.; Yun, H., A multienzyme biocatalytic cascade as a route  
431 towards the synthesis of  $\alpha,\omega$ -diamines from corresponding cycloalkanols. *Green*  
432 *Chem.* **2023**, 25 (2), 543-549.
- 433 14. Zhang, Z. W.; Fang, L.; Wang, F.; Deng, Y.; Jiang, Z. B.; Li, A. T., Transforming  
434 inert cycloalkanes into  $\alpha,\omega$ -diamines by designed enzymatic cascade catalysis.  
435 *Angew. Chem. Int. Ed.* **2023**, 62 (16), 10.
- 436 15. Kim, Y. C.; Yoo, H.-W.; Park, B. G.; Sarak, S.; Hahn, J.-S.; Kim, B.-G.; Yun, H.,  
437 One-Pot Biocatalytic Route from Alkanes to  $\alpha,\omega$ -Diamines by Whole-Cell  
438 Consortia of Engineered *Yarrowia lipolytica* and *Escherichia coli*. *ACS Synth. Biol*  
439 **2024**, 13 (7), 2188-2198.
- 440 16. Hwang, S.-Y.; Woo, J.-M.; Choi, G. E.; Oh, D.-K.; Seo, J.-H.; Park, J.-B., Biological  
441 Reaction Engineering for the Preparation of C9 Chemicals from Oleic Acid: 9-  
442 Aminononanoic Acid, 1,9-Nonanediol, 9-Amino-1-nonanol, and 1,9-  
443 Diaminononane. *ACS Catal.* **2024**, 14 (6), 4130-4138.
- 444 17. Gopal, M. R.; Dickey, R. M.; Butler, N. D.; Talley, M. R.; Nakamura, D. T.;  
445 Mohapatra, A.; Watson, M. P.; Chen, W.; Kunjapur, A. M., Reductive enzyme  
446 cascades for valorization of polyethylene terephthalate deconstruction products.  
447 *ACS Catal.* **2023**, 13 (7), 4778-4789.
- 448 18. Giri, P.; Lim, S.; Khobragade, T. P.; Pagar, A. D.; Patil, M. D.; Sarak, S.; Jeon, H.;  
449 Joo, S.; Goh, Y.; Jung, S.; Jang, Y. J.; Choi, S. B.; Kim, Y. C.; Kang, T. J.; Heo,

- 450 Y. S.; Yun, H., Biocatalysis enables the scalable conversion of biobased furans  
451 into various furfurylamines. *Nat. Commun.* **2024**, *15* (1), 6371.
- 452 19. Yang, W.; Liu, H.; Li, S.; Luo, J.; Liang, C., Selective Hydrogenation of Adiponitrile  
453 to Hexamethylenediamine by Supported Co Catalyst under Alkali-Free  
454 Conditions. *Industrial & Engineering Chemistry Research* **2024**, *63* (26), 11374-  
455 11383.
- 456 20. Wu, R.; Wang, H.; Li, H.; Tian, X. Catalyst containing skeleton Ni for preparation  
457 of 1,4-diaminomethyl benzene and preparation method thereof. CN102179259,  
458 **2011**.
- 459 21. Robert, X., & Gouet, P. Deciphering key features in protein structures with the  
460 new ENDscript server. *NucleicAcids Res.* **2014**, *42*, W320–W324.
